1 **Identification of new MmpL3 inhibitors by untargeted and targeted mutant screens**  
2 **defines MmpL3 domains with differential resistance**

3

4 John T. Williams<sup>1</sup>, Elizabeth R. Haiderer<sup>1</sup>, Garry B. Coulson<sup>1</sup>, Kayla N. Conner<sup>1</sup>, Edmund  
5 Ellsworth<sup>2</sup>, Chao Chen<sup>3</sup>, Thomas Dick<sup>3</sup>, and Robert B. Abramovitch<sup>1\*</sup>

6 <sup>1</sup>Department of Microbiology and Molecular Genetics, and <sup>2</sup>Department of Pharmacology and  
7 Toxicology, Michigan State University, East Lansing, Michigan, 48824, United States. <sup>3</sup>Public  
8 Health Research Institute, Rutgers New Jersey Medical School, Newark, NJ, 07130, United  
9 States.

10

11

12

13

14

15

16

17

18 *\*Corresponding Author*

19 Robert B. Abramovitch

20 E-mail: [abramov5@msu.edu](mailto:abramov5@msu.edu)

21 Phone: (517) 884-5416

22 Fax: (517) 353-8957

23

## 24 **Abstract**

25           The *Mycobacterium tuberculosis* (Mtb) mycolic acid flippase MmpL3 has been the  
26 proposed target for multiple inhibitors with diverse chemical scaffolds. This diversity in chemical  
27 scaffolds has made it difficult to predict compounds that inhibit MmpL3 without whole genome  
28 sequencing of isolated resistant mutants. Here we describe the identification of four new  
29 inhibitors that select for resistance mutations in *mmpL3*. Using these resistant mutants, we  
30 conducted a targeted whole-cell phenotypic screen of 163 novel Mtb growth inhibitors for  
31 differential growth inhibition of wild type Mtb as compared to a pool of twenty-four unique  
32 *mmpL3* mutants. The screen successfully identified six additional putative MmpL3 inhibitors.  
33 The compounds were bactericidal both *in vitro* and against intracellular Mtb. Mtb cells treated  
34 with these compounds were shown to accumulate trehalose monomycolate and have reduced  
35 levels of trehalose dimycolate, supporting MmpL3 as the target. The inhibitors were  
36 mycobacteria specific with several also showing activity against the non-tuberculosis  
37 mycobacterial species *M. abscessus*. Cluster analysis of cross resistance profiles generated by  
38 dose response experiments for each combination of 13 MmpL3 inhibitors against each of the 24  
39 *mmpL3* mutants defined two clades of inhibitors and two clades of *mmpL3* mutants. Pairwise  
40 combination studies of the inhibitors revealed interactions that were specific to the clades  
41 identified in the cross-resistance profiling. Additionally, modeling of resistance substitutions to  
42 the MmpL3 crystal structure revealed clade specific localization of the residues to specific  
43 domains of MmpL3, with the clades showing differential resistance. Several compounds  
44 exhibited high solubility and stability in microsomes and low cytotoxicity in macrophages,  
45 supporting their further development. The combined study of multiple mutants and novel  
46 compounds provides new insights into structure-function interactions of MmpL3 and small  
47 molecule inhibitors.

48

49

## 50 Introduction

51 In efforts to identify new tuberculosis (TB) antibiotics, whole cell-based phenotypic  
52 screens have been conducted against the pathogen *Mycobacterium tuberculosis* (Mtb). Over  
53 the last decade, several of these screens have identified MmpL3 as the proposed target for  
54 diverse small molecule inhibitors including AU1235, BM212, C215, DA-5, E11,  
55 indolecarboxamides, HC2091, NITD-349, PIPD1, Rimonabant, Spiro, TBL-140, THPP and  
56 SQ109<sup>1, 2, 3, 4, 5, 6, 7, 8, 9, 10, 11, 12</sup>. MmpL3 is an essential flippase responsible for transporting  
57 acetylated-trehalose monomycolate (TMM) synthesized in the cytoplasm to the pseudo-  
58 periplasmic space<sup>13, 14, 15, 16, 17</sup>. These TMMs are then converted into trehalose dimycolate (TDM)  
59 by the Ag85 complex in the cell envelope<sup>18</sup>. MmpL3 is essential as evidenced by a pre-existing  
60 rescue allele being required to generate an *mmpL3* knockout<sup>2, 14, 17, 19, 20, 21</sup>, lack of mutants in  
61 high-throughput transposon mutagenesis screens<sup>22, 23</sup>, and studies that show rapid killing *in vitro*  
62 and *in vivo* in acute infection models when *mmpL3* expression is conditionally inhibited<sup>14, 19</sup>. This  
63 makes MmpL3 an attractive target for drug development, with one of its inhibitors, SQ109,  
64 currently in clinical trials<sup>24</sup>.

65 MmpL3 inhibitors fall into diverse classes of chemical scaffolds<sup>25, 26, 27</sup>, making it hard to  
66 computationally predict potential MmpL3 inhibitors based on chemical scaffolds. However, given  
67 the frequent finding of MmpL3 as a target, it is reasonable to expect that many new hits in a  
68 high throughput screen (HTS) may be acting against MmpL3. MmpL3 inhibitors have been  
69 identified by the isolation and sequencing of resistant mutants with single nucleotide variations  
70 (SNVs) mapping to the coding region of *mmpL3*, which is time-consuming and costly. Efforts to  
71 discover MmpL3 inhibitors using targeted approaches include generating hypomorphs, where a  
72 *mmpL3* knock down strain showed enhanced sensitivity to MmpL3 inhibitors, including AU1235  
73<sup>14</sup>. However, this strain was also shown to be sensitive to isoniazid (INH) an inhibitor of InhA of  
74 the FAS-II pathway involved in mycolic acid synthesis, suggesting that while a *mmpL3*

75 knockdown strain has robust screening potential for inhibitors of mycolic acid synthesis,  
76 maturation, and transport, such strains are not specific enough to identify inhibitors that  
77 selectively target MmpL3.

78 An alternative approach, employed in this study, is to use a pool of *mmpL3* resistant  
79 mutants to discover potential MmpL3 inhibitors. MmpL3 is a member of the resistance  
80 nodulation and division (RND) family of proteins, normally associated with efflux pumps in gram-  
81 negative bacteria <sup>2, 13, 17</sup>. However, evidence suggests MmpL3 does not act as a general efflux  
82 pump in resistant backgrounds as resistant mutants do not differ in the amount of inhibitor  
83 isolated from cell fractions compared to WT Mtb <sup>2</sup>. In further support that MmpL3 does not act  
84 as an efflux pump, the low level of cross resistance to compounds not associated with MmpL3  
85 inhibition, including INH, suggests that MmpL3 does not act as a general efflux pump <sup>21</sup>. This  
86 suggests that MmpL3 inhibitor resistant mutants could be used to screen for other potential  
87 MmpL3 inhibitors. The goal of this study was to discover MmpL3 inhibitors from a collection of  
88 163 newly discovered, uncharacterized inhibitors of Mtb growth <sup>28</sup>. Herein we describe the  
89 identification of four novel MmpL3 inhibitors by isolation of resistant Mtb mutants with mutations  
90 mapping to *mmpL3*. These twenty-four unique Mtb *mmpL3* mutant strains were then pooled into  
91 a single batch culture to conduct a targeted whole-cell phenotypic screen to identify six new  
92 scaffolds with reduced activity in the mixed mutant population as compared to the wild type.  
93 Cross resistance and compound interactions studies demonstrate specific structure function  
94 interactions between the molecules and MmpL3 and defined domains of MmpL3 associated  
95 with differential resistance to MmpL3 inhibitors.

96

97



## 98 Results

### 99 Identification of four new MmpL3 inhibitors by isolation of resistant mutants

100 Previously, two HTS were conducted, targeting the two component regulatory systems,  
101 DosRST and PhoPR<sup>28, 29, 30</sup>. In addition to inhibitors targeting these pathways, a series of  
102 compounds was identified that inhibited Mtb growth independent of the targeted pathways<sup>9, 28,</sup>  
103 <sup>30</sup>. A series of high throughput assays were then conducted to prioritize these compounds  
104 (Supplemental Figure 1) including confirming hits, testing for eukaryotic cytotoxicity in primary  
105 murine bone marrow-derived macrophages (BMMΦ, ≤10% cytotoxicity), and testing for the  
106 ability of the compounds to inhibit Mtb growth inside BMMΦ (≥25% growth inhibition). Results of  
107 these screens identified 216 compounds of which 163 commercially available compounds were  
108 purchased as fresh powders. In order to identify the mechanism of action of these Mtb growth  
109 inhibitors our lab selected several compounds with potent Mtb growth inhibition, both *in vitro* and  
110 in macrophages, as well as low eukaryotic cytotoxicity.

111 Four compounds of interest HC2060, HC2149, HC2169, and HC2184 (1-({1-[4-  
112 (Benzyloxy)-3-methoxybenzyl]piperidin-3-yl)carbonyl}azepane, N-[2-Methyl-6-  
113 (trifluoromethyl)pyridin-3-yl]-4-(trifluoromethyl)benzamide, Ethyl 3-[(3,4-dihydro-2H-chromen-3-  
114 ylamino)carbonyl]amino}benzoate, and N-(2-Diethylaminoethyl)-N-(5,7-dimethyl-1,3-  
115 benzothiazol-2-yl)furan-2-carboxamide, respectively) (Figure 1a) had half maximal effective  
116 concentrations (EC<sub>50</sub>) ranging from 1.8 μM to 16.9 μM *in vitro* (Figure 1b, Table 1). All four  
117 compounds had bactericidal activity when measured at 20 μM (2x the initial screening  
118 concentration) (Figure 1c). To our knowledge, the structures of these compounds are unique  
119 from previously described inhibitors of Mtb growth.

120 To understand the mechanism of action of these four compounds, resistant mutants  
121 were isolated using solid agar plates (7H10 OADC) amended with 20 or 40 μM of each  
122 compound inoculated with 10<sup>9</sup> CFU of Mtb (Erdman). Isolated mutants were tested for

123 resistance via dose response curves. Confirmed resistant clones were isolated as single  
124 colonies and retested to confirm resistance (Supplemental Figure 2a-d). Genomic DNA was  
125 extracted from confirmed resistant mutant strains and the genomes were sequenced. Analysis  
126 of the genome sequences identified single nucleotide variants (SNVs) in all of the genomes in  
127 the coding region of *mmpL3* (Rv0206c, Supplemental Table 1). These mutations encoded for  
128 nonsynonymous mutations located throughout the gene (Supplemental Table 1, Supplemental  
129 Figure 2e). These findings suggest these compounds may be functioning as MmpL3 inhibitors.

130

### 131 **Modulation of TMM and TDM accumulation**

132 MmpL3 is responsible for the transport of TMM across the inner membrane<sup>14, 15, 16, 18</sup>. To  
133 determine if these compounds inhibited the activity of MmpL3, cultures of Mtb were grown in the  
134 presence of <sup>14</sup>C-acetate and treated for 24 h with 20 μM of HC2060, HC2149, HC2169,  
135 HC2184, SQ109 or equal volumes of dimethylsulfoxide (DMSO). Radiolabeled lipids were  
136 isolated and analyzed by thin layer chromatography (TLC) (Figure 2a, Supplemental Figure 3a).  
137 The results of the lipid assay show that TMM accumulates in Mtb samples treated with the  
138 proposed MmpL3 inhibitors as well as the SQ109 treated samples. Additionally, TDM  
139 significantly decreased in cultures treated with HC2169 and HC2184 as well as the positive  
140 control SQ109 (Figure 2a and Supplemental Figure 3a). These results are consistent with  
141 previously described MmpL3 inhibitors<sup>1, 2, 3, 4, 6, 7, 8, 9, 26</sup> and support that these four compounds  
142 inhibit MmpL3 activity.

143

### 144 **Targeted whole cell phenotypic screen for MmpL3 Inhibitors**

145 The identification of four new MmpL3 inhibitors, as well as the previously published  
146 inhibitor HC2091 (6), suggested additional MmpL3 inhibitors may exist in the prioritized 163-  
147 compound library of Mtb growth inhibitors (Supplemental Figure 1). Review of the known  
148 MmpL3 inhibitor scaffolds and those in our compound library identified HC2172 as the

149 previously described MmpL3 inhibitor C215 <sup>7</sup>. A recent study by McNeil *et al.*, showed that  
150 *mmpL3* mutant strains had low cross resistance against non-MmpL3 inhibitors<sup>21</sup>, suggesting  
151 that *mmpL3* mutants could be used to screen for MmpL3 inhibitors. Additionally, this study also  
152 showed that different mutations conferred varying levels of cross resistance between MmpL3  
153 inhibitors. We therefore hypothesized that by pooling unique *mmpL3* mutant strains into a single  
154 mixed culture we could overcome limitations of cross resistance variability. For the targeted  
155 phenotypic screen, we directly compared percent growth inhibition (%GI) of either WT or a  
156 mixed *mmpL3* mutant pool consisting of twenty-four unique *mmpL3* mutant strains, including  
157 three strains previously described as resistant to HC2091 <sup>9</sup> (see Supplemental Table 2). The  
158 cultures were treated with 20µM of each of the 163-Mtb growth inhibitors as well as DMSO  
159 (negative control), Rifampin (RIF, positive control), Bedaquiline (BDQ), Clofazimine (CFZ), INH,  
160 para-aminosalicylic acid (PAS), H<sub>2</sub>O<sub>2</sub>, or SQ109 for a total of 171 different treatments  
161 (Supplemental Figure 4a and 4b). The results of this screen identified thirty-two compounds with  
162 15% GI in the WT background and 1.5x reduced activity in the mixed *mmpL3* mutant  
163 background relative to the WT background (examples of positive hits are illustrated in red in  
164 Figure 3a). These hits were tested by dose response experiments conducted in both the WT  
165 and mixed *mmpL3* mutant background. In total, we identified thirteen compounds with reduced  
166 activity in the mixed *mmpL3* mutant background (Table 1, Supplemental Figure 5). Included in  
167 our confirmed hits were each of the five inhibitors used to generate the *mmpL3* mutant strains  
168 (HC2060, HC2091, HC2149, HC2169, and HC2184) and the two control compounds C215 and  
169 SQ109. The targeted screen also identified six novel inhibitors including HC2032, HC2099,  
170 HC2134, HC2138, HC2178, and HC2183 (ethyl 4-[(2E)-2-(4,7,7-trimethyl-3-oxo-2-  
171 bicyclo[2.2.1]heptanylidene)hydrazinyl]benzoate, 2-[(6-chloro-1H-benzimidazol-2-yl)sulfanyl]-  
172 N,N-di(propan-2-yl)acetamide, N-(2-methoxy-5-nitrophenyl)-1-oxo-4-phenylisochromene-3-  
173 carboxamide, 1-cyclohexyl-3-[4-[(2-fluorophenyl)methyl]-3-oxo-1,4-benzoxazin-7-yl]urea, 1-  
174 cyclooctyl-4-(2,5-dimethylphenyl)piperazine, and 2-[(6-methyl-1H-benzimidazol-2-yl)sulfanyl]-

175 N,N-di(propan-2-yl)acetamide, respectively) (Figure 3b), which have not been previously  
176 described as MmpL3 inhibitors. The amount of resistance conferred by the mixed *mmpL3*  
177 mutant strains against each compound varied, with some compounds, like HC2032, HC2138,  
178 and HC2169 losing nearly all activity in the mutant background (Supplemental Figure 5) as  
179 indicated by the high Relative EC<sub>50</sub> (fold difference between *mmpL3* mutant pool and WT)  
180 values of >36, >20, and >44 (Table 1). Despite the high activity of SQ109 in the WT  
181 background, the relative EC<sub>50</sub> was only 2 (Table 1); however, this observation is consistent with  
182 previous studies which only report marginal increases in MIC values in *mmpL3* mutant  
183 backgrounds<sup>8, 9, 21, 26</sup>. Included in our hits were two urea-based compounds HC2138 and  
184 HC2169 (Figure 1 and Figure 3b). These urea-based compounds have structures reminiscent of  
185 the adamantyl-urea MmpL3 inhibitor AU1235<sup>2</sup>. Additionally, two of the compounds identified in  
186 the screen HC2099 and HC2183 had high structure similarity.

187 The compounds were also tested for eukaryotic cytotoxicity, solubility and stability in  
188 mouse microsomes, and the structures were confirmed by mass spectrometry (Table 1). The  
189 compounds exhibited low cytotoxicity (>100μM), consistent with our secondary assay screening.  
190 Compounds exhibited varying levels of solubility with HC2169 and HC2138 showing lower  
191 solubility (66μM and 17μM respectively) but high microsome stability (122% and 168%  
192 respectively), and compounds like HC2183 showing high solubility (>200μM) but low microsome  
193 stability (25%). Interestingly HC2099, which has high structure similarity to HC2183 showed  
194 higher solubility (178μM) and higher microsome stability (71%). Several of the compounds (e.g.  
195 HC2091, HC2099, HC2138 and HC2149), exhibited favorable solubility and microsome stability,  
196 with no observed macrophage cytotoxicity, supporting their potential for further development.

197 The phenotypic screen was selective as it did not identify any of the control treatments  
198 known to not target MmpL3 including BDQ, INH, PAS, H<sub>2</sub>O<sub>2</sub>, or HC2051, a proposed Pks13  
199 inhibitor (given its similarity to the TAM16<sup>31, 32</sup>). To confirm the specificity of our screen, we  
200 conducted dose response studies in both the WT and mixed *mmpL3* mutant background for

201 each of the aforementioned inhibitors, as well as RIF. Results of the dose response studies did  
202 not identify any significant levels of resistance to these compounds in the mixed *mmpL3* mutant  
203 background (Supplemental Table 3, Supplemental Figure 6). This was true for both inhibitors of  
204 mycolic acid synthesis and maturation (INH and HC2051), suggesting our screen was specific  
205 for inhibitors of MmpL3. Consistent with previous results, we identified increased susceptibility  
206 to RIF treatment in the mixed *mmpL3* mutant background<sup>21</sup> (Supplemental Table 3,  
207 Supplemental Figure 6). The dose response profiles for BDQ, CFZ, and PAS did not show any  
208 differences in susceptibility, further supporting that *mmpL3* mutations do not confer resistance  
209 through general efflux.

210

#### 211 **Modulation of TDM, membrane potential and viability**

212 To determine if the six compounds identified in the screen can inhibit MmpL3 activity, we  
213 examined accumulation of TMM and TDM as described above. The inhibitors modulated  
214 mycolic acid accumulation in whole cell extracts, with lipids for all treatments showing a  
215 significant accumulation in TMM (except for HC2134) and treatment with HC2032, HC2099,  
216 HC2138, and HC2178 showing a significant decrease in TDM relative to the DMSO control  
217 samples (Figure 2b and 2c, Supplemental Figure 3b). A recent report has shown that because  
218 MmpL3 activity is dependent on the proton motive force (PMF), disruptors of PMF, such as the  
219 protonophore carbonyl cyanide m-chlorophenyl hydrazine (CCCP) can also modulate MmpL3  
220 activity<sup>26</sup>. Studies have suggested that some proposed MmpL3 inhibitors such as SQ109 and  
221 E11 may indirectly target MmpL3 through disruption of the membrane potential<sup>6, 15, 26</sup>. To  
222 determine if the newly identified inhibitors disrupt membrane potential ( $\Delta\psi$ ) we conducted dose  
223 response studies using a DiOC<sub>2</sub>-based assay. Some compounds, including HC2060, HC2169,  
224 and HC2183 did not disrupt membrane potential (Table 1, Supplemental Figure 7), while others,  
225 such as HC2032, HC2099, HC2134, HC2138, HC2149, HC2178, HC2184 and C215 did disrupt  
226 membrane potential (Table 1, Supplemental Figure 7). Consistent with previous observations

227 HC2091 did not disrupt membrane potential, while SQ109 did disrupt membrane potential  
228 (Table 1, Supplemental Figure 7)<sup>9, 15, 26</sup>. Surprisingly, there were differences in outcome for the  
229 two urea containing compounds HC2169 and HC2138 as well as between HC2099 and HC2183  
230 which only differ by a chloro and methyl substitution, respectively. The results for HC2138 and  
231 HC2169 is also interesting because the previously described urea-based MmpL3 inhibitor,  
232 AU1235, does not disrupt the membrane potential<sup>15, 26</sup>. These results suggest that the ability to  
233 disrupt membrane potential is highly structure specific.

234 Because MmpL3 is essential for viability of replicating bacteria, we tested these  
235 compounds for bactericidal activity using a firefly luciferase (*luc*) reporter strain of Mtb in  
236 conjunction with a luciferase assay. This assay relies on active luciferase generated by the  
237 reporter Mtb strain, and the presence of ATP which is generated in living cells, but rapidly  
238 hydrolyzed in lysed cells. All of these compounds showed bactericidal activity (Supplemental  
239 Figure 8). These results suggest that the growth inhibition is due to compounds killing Mtb in a  
240 dose dependent manner. The bactericidal activity of these inhibitors is consistent with these  
241 compounds targeting MmpL3 which is essential for cell viability<sup>14, 19</sup>.

242

### 243 **Spectrum of activity**

244 While MmpL3 is conserved in mycobacteria, functional orthologs are not found in other  
245 bacteria and fungi. Despite this, several proposed MmpL3 inhibitors including BM212, THPP,  
246 and SQ109 have been shown to inhibit multiple bacterial and fungal species<sup>8, 33, 34, 35</sup> while other  
247 MmpL3 inhibitors including HC2091, AU1235, and indolecarboxamides are specific to  
248 mycobacteria. To define the spectrum of activity, the compounds were tested against several  
249 diverse species including *Staphylococcus aureus*, *E. coli*, *Pseudomonas aeruginosa*, *Proteus*  
250 *vulgaris*, and *Enterococcus faecalis* (Table 2). For HC2032, HC2060, HC2099, HC2149,  
251 HC2169, HC2178 and HC2184, even at high concentrations (200 $\mu$ M), no inhibition was  
252 observed against non-mycobacteria. However, these inhibitors were positive for activity against

253 other mycobacteria, including the pathogenic non-tuberculosis species *M. abscessus* and the  
254 saprophytic species *M. smegmatis* (Table 2). For example, HC2091, HC2099, and HC2134  
255 exhibited MIC<sub>50</sub> of 6.25 μM, 25 μM and 12.5 μM against *M. abscessus*, respectively.  
256 Additionally, all of the MmpL3 inhibitors tested, except for HC2149, were active against *M.*  
257 *smegmatis*. This suggests that most of the inhibitors are specific for mycobacteria and may be  
258 effective against diverse mycobacterial species. The observation that HC2134 and C215 are  
259 active against non-mycobacterial species has been observed with other MmpL3 inhibitors<sup>24, 34,</sup>  
260 <sup>35</sup> and may be due to a non-specific activities such as PMF disruption.

261

### 262 **Activity against intracellular Mtb**

263 The compounds were tested against Mtb growing in BMMΦ using a luciferase  
264 expressing Mtb strain. BMMΦ were infected with Mtb and treated with the inhibitors for six days  
265 across a range of concentrations (200 – 0.3μM). The BMMΦ EC<sub>50</sub> values are summarized in  
266 Table 1 and Supplemental Figure 9. The results of the assay show that many of the inhibitors  
267 have bactericidal activity in MΦ several magnitudes lower than the eukaryotic cytotoxicity CC<sub>50</sub>,  
268 supporting a high selectivity index. The identification of bactericidal effects against Mtb in  
269 BMMΦ is consistent with genetic knockdown studies that show *mmpL3* is essential for actively  
270 replicating bacteria (4,5).

271

### 272 **Cross resistance profiles indicate specific MmpL3 protein-inhibitor interactions**

273 While the results of the screen showed potential for rapid identification of MmpL3  
274 inhibitors, the screen relied on the use of a mixed mutant population. To resolve this issue, we  
275 conducted dose response studies for each combination of the twenty-four unique *mmpL3*  
276 mutants against each MmpL3 inhibitor identified from the screen (with WT Mtb as a control).  
277 Because there was a complete lack of activity for compounds like HC2169 against HC2169-  
278 specific resistant mutants (Supplemental Figure 2c), units of measure such as EC<sub>50</sub> and MIC



279 cannot be calculated, or are not a good measure for comparing responses. Instead, we used  
280 the area under the curve (AUC) for each dose response in the *mmpL3* mutant backgrounds  
281 relative to the AUC for the WT response for a given treatment (Supplemental Table 4). Because  
282 the compounds have differences in potency, the AUC for the WT for each treatment differs and  
283 to account for this issue we normalized our values by Z-score for each treatment<sup>36</sup>. Cluster  
284 analysis grouped the data based on both treatment effectiveness and resistance conferred by  
285 each *mmpL3* mutant. The resulting cluster-gram (Figure 4) shows that both compounds and  
286 *mmpL3* mutant strains, denoted by the amino acid substitutions, fall into distinct clades. The  
287 compounds fall into two distinct clades, Clade A (Red), which contains HC2134, HC2138,  
288 HC2149, HC2169, and Clade B (Green) which contains HC2032, HC2060, HC2091, HC2099,  
289 HC2178, HC2183, HC2184, C215, and SQ109. The identification of two distinct clades of  
290 compounds, suggested that the compounds may be interacting with the MmpL3 protein in  
291 distinct ways.

292 The resistance mutations also showed specific clustering. Cluster analysis of the strains  
293 showed that WT clustered on its own and the mutants formed a large complex cluster. Within  
294 this large cluster, the *mmpL3* mutant strains formed into two sub-clades; Clade I (Green) which  
295 conferred relatively high resistance (lower inhibitor effectiveness) and Clade II (Red) which  
296 conferred relatively low resistance (higher inhibitor effectiveness). Clade I, which contained  
297 eleven *mmpL3* mutant strains denoted as Y252C, V285G, G253E, L567P, I585S, S591I,  
298 S591T, V643M, F644N, F644L, and M649L. Clade II consisted of the remaining thirteen *mmpL3*  
299 mutant strains denoted as Q40H, V240A, I244T, L299Q, T311I, R373W, M649T, A662E, T670L,  
300 L693P, M695T, L699M, and A700T. Surprisingly M649T fell into Clade II mutations, this was  
301 striking as the *mmpL3* mutant denoted as M649L was clustered with the Clade I *mmpL3* strains.

302

303



304

## 305 **Pairwise Combination Studies using DiaMOND**

306 We hypothesized that the clustering of compounds into two clades was due to their  
307 having distinct interactions with MmpL3; therefore, combination treatments may reveal  
308 antagonistic, additive or synergistic interactions. In order to test this hypothesis in whole cell  
309 Mtb, we used the recently described diagonal measurement of  $n$ -way drug interactions  
310 (DiaMOND) approach<sup>37</sup>. RIF was included as a control for these assays, as this drug has been  
311 shown to be synergistic when tested with other MmpL3 inhibitors such as AU1235 and SQ109  
312<sup>38, 39</sup>. The results of DiaMOND, shown in Figure 5, identified synergistic interactions ( $FIC_2 < 1.0$ )  
313 between all combinations of MmpL3 inhibitors and RIF. Additionally, the results identified mostly  
314 additive interactions ( $FIC_2 = 1.0$ ) consistent with the compounds sharing a single target.  
315 Interestingly, all combinations between MmpL3 inhibitors and the compounds HC2134,  
316 HC2138, HC2149, and HC2169 showed antagonistic interactions ( $FIC_2 > 1.0$ ). These four  
317 compounds were clustered together in Clade A in the cross-resistance profiles described above  
318 (Figure 4). This antagonistic relationship further supports that the Clade A compounds are  
319 distinct from the Clade B compounds. Another observation from the DiaMOND assay is that  
320 pairwise combinations of compounds HC2060, C215, and SQ109 all had synergistic interactions  
321 (Figure 5). The reason for this observation is not clear as the compounds did not have  
322 differential cross resistance profiles (Figure 4). Interestingly, combinations of HC2060 and  
323 C215, but not SQ109, with the Clade A compounds HC2139 and HC2169 did not reveal  
324 antagonist interactions, but instead additive interactions (Figure 5). This finding supports that  
325 these HC2060 and C215 compounds interact with MmpL3 in a manner distinct from the other  
326 compounds.

327

328

## 329 Discussion

330 The cross-resistance profiles showed that the *mmpL3* mutant strains clustered  
331 separately into two clades, Clade I and Clade II, with WT clustering on its own as an outgroup  
332 (Figure 4). Recently, the crystal structure of *M. smegmatis* MmpL3 has been solved by two  
333 independent groups<sup>12, 40</sup>. In order to understand this observation, we generated a 3D model of  
334 the Mtb MmpL3 protein aligned to the *M. smegmatis* MmpL3 structure<sup>41</sup> (C-score 0.17, RMSD  
335 8.4 ±4.5Å). Substitutions from the *mmpL3* mutant strains used in the cross-resistance profiles  
336 are highlighted in the model (red, green, and blue) (Figure 6). Consistent with previously  
337 described resistant strains of Mtb, the majority of the substitutions, localized along the central  
338 vestibule with the exception of T670, R373, and A662 which did not align along the central  
339 vestibule of the model (Figure 6)<sup>17</sup>. This vestibule is conserved amongst the RND family of  
340 proteins and is responsible for the proton translocation that drives protein activity<sup>17, 26</sup>. To  
341 understand the clustering pattern of the cross-resistance profiling we highlighted the mutations  
342 based on their clade, revealing that the two distinct clades separated spatially in the model. The  
343 substitutions of Clade I (Green), that conferred higher resistance, localized towards the  
344 cytoplasmic face of the protein. While substitutions of Clade II (Red), which generated lower  
345 resistance, localized into two separate locations: i) towards the pseudo-periplasmic face of the  
346 protein; and, ii) another region which does not line the central vestibule (Figure 6). Structure  
347 function profiling by Belardinelli and colleagues<sup>17</sup> had previously described seven essential  
348 residues for MmpL3 function (D251, S288, G543, D640, Y641, D710, and R715) that clustered  
349 in a single domain<sup>17</sup>. This study also modeled substitutions commonly identified from resistant  
350 mutants to multiple inhibitors to this same region. To determine if the two clades separated  
351 based on their approximation to this essential region, we highlighted these seven residues in the  
352 model (Supplemental Figure 10). Notably, the two clades separate based on their proximity to  
353 these residues, with Clade I substitutions localizing in the same region as the essential residues

354 and Clade II substitutions localizing distally from the essential residues. This finding suggests  
355 that the strength of resistance conferred by a mutation is dependent on the proximity of the  
356 substitution to residues essential for MmpL3 function.

357 Genome sequences of the isolated resistant mutants identified a total of 21 unique  
358 mutations in *mmpL3*. These mutations translated to substitutions that were a mix of ones  
359 previously described and novel to this study. Included in this list were substitutions that had  
360 previously been described including G253E, Y252C, L567P, S591I, V643M, F644L, L699M<sup>1, 2, 5,</sup>  
361<sup>6, 8, 9, 21, 31</sup>. Mutations that were unique to this study included ones in positions in V240, I244,  
362 V285, L299, T311, R373, I585, A662, and L693. We also isolated mutations that had previously  
363 been described to occur in positions Q40, Y252, G253, L567, S591, F644, M649, and L699<sup>1, 2, 5,</sup>  
364<sup>6, 8, 9, 21, 31</sup>. However, the exact substitutions in several of these strains' positions including Q40H,  
365 S591T, F644N, and M649T were unique to this study. Our cross-resistance profiling found that  
366 G253E, V285G, S591I, S591T, L699M, and A700T, conferred pan resistance including against  
367 SQ109. That the number of compounds proposed to target MmpL3 and the large number of  
368 substitutions that confer resistance highlights the importance of identifying combinations of  
369 drugs that would reduce the frequency of resistance.

370 The favorable properties of many of these compounds, including low cytotoxicity, high  
371 solubility and microsome stability, and activity in macrophages, suggests that these compounds  
372 warrant further development as new therapeutics. It is also possible that combinations of these  
373 scaffolds may be developed in a single molecule that can function to reduce the frequency of  
374 resistance. Three of the compounds used to isolate resistant mutants in this study, HC2149,  
375 HC2169 and HC2184, had a frequency of resistance (FoR) of  $3 \times 10^{-7}$ , which is similar to the  
376 FoR of other MmpL3 inhibitors that have a FoR ranging from  $10^{-7}$  to  $10^{-8}$ <sup>2, 3, 4, 5, 6, 21</sup>. That the  
377 FoR for HC2184 was the same as the FoR for HC2149 and HC2169 is interesting as the cross-  
378 resistance profiles and results of DiaMOND analysis suggested that these compounds interact

379 differently with MmpL3. While the antagonistic interactions identified by DiaMOND suggest that  
380 scaffold combinations may lower the activity of a single inhibitor, antagonistic drug combinations  
381 have been proposed to decrease the rate of resistance<sup>42, 43</sup>. It therefore may be possible to  
382 design a single inhibitor that fuses more than one scaffold to decrease the rate of resistance.  
383 This hypothesis could initially be tested by conducting pairwise combination studies examining  
384 for synergistic reductions in the FoR. Given the relative ease of resistance occurring to MmpL3  
385 inhibitors, a reduced FoR could be a valuable new property for this class of inhibitors.

386 Over the past decade, many MmpL3 inhibitor of various chemical scaffolds have been  
387 described. The proposed target of these inhibitors has been driven by the mapping of resistance  
388 mutations to *mmpL3*. The screening platform we describe here greatly accelerates target  
389 identification of such inhibitors. The use of a diverse pool of unique *mmpL3* mutants, rapidly  
390 identified inhibitors of MmpL3 activity, as demonstrated by their ability to modulate TDM and  
391 TMM accumulation. A subset of these inhibitors was shown to disrupt membrane potential, and  
392 potentially the PMF which energizes MmpL3 activity. Two recent studies have suggested that  
393 two MmpL3 inhibitors, SQ109 and E11, indirectly inhibit MmpL3 by targeting the PMF despite  
394 the isolation of *mmpL3* resistant mutants<sup>6, 15</sup> and co-crystallization of SQ109 to MmpL3<sup>12</sup>. It is  
395 therefore possible that some of these new compounds inhibit MmpL3 indirectly by dissipation of  
396 the PMF. Notably, the narrow spectrum of activity of most of the isolated compounds for  
397 mycobacteria supports that the target is mycobacterium specific, and not a general target that  
398 when bound dissipates PMF.

399

400

## 401 **Methods**

### 402 **Media and Growth Conditions**

403 Unless otherwise specified, streptomycin resistant strains of Mtb Erdman or CDC1551  
404 were cultured in 7H9 media supplemented with 10% OADC (v/v) with 0.05% Tween-80 (v/v) in  
405 standing T25, T75 or T150 flasks at 37 °C with 5% CO<sub>2</sub>. Spectrum of activity studies in different  
406 bacterial species (Table 2) were conducted as described by Coulson et al.,<sup>30</sup>, with the  
407 exception of the *M. abscessus* studies which are described in the supplemental methods.

408

### 409 **Dose Response Curves**

410 Mtb was grown in rich medium to an OD<sub>600</sub> of 0.5-1.0. Cultures were diluted to an OD<sub>600</sub>  
411 of 0.1 in 7H9 medium and aliquoted into black walled clear bottom 96 well assay plates.  
412 Compounds were tested between 80-0.13 μM with 2.5-fold dilutions, controls included DMSO  
413 and 3 μM RIF. Plates were placed in zip lock bags with moistened paper towels and incubated  
414 at 37°C for 6 days. Plates were read on a PerkinElmer Enspire plate reader. %GI was  
415 calculated using DMSO and RIF as 0% and 100% inhibition, respectively. Dose responses were  
416 conducted in biological triplicate and repeated at least once. Significant differences of EC<sub>50</sub> were  
417 compared using 95% confidence intervals.

418 To examine the spectrum of activity of the MmpL3 inhibitors, the EC<sub>50</sub> of each compound  
419 was also determined for *M. smegmatis* and other nonmycobacteria, including *S. aureus*, *E. coli*,  
420 *P. aeruginosa*, *P. vulgaris*, and *E. faecalis*. Tests were performed in 96-well plates in LB broth  
421 with shaking at 37°C, with the exception of *E. faecalis*, which was grown in brain heart infusion  
422 medium in standing flasks at 37°C, and *M. smegmatis*, which was also grown standing at 37°C  
423 in LB broth with 0.05% Tween-80. Culture was diluted to a starting OD<sub>600</sub> of 0.05. Bacteria were  
424 incubated in the presence of an 8-point (2-fold) dilution series of each inhibitor ranging from 200  
425 μM to 1.5 μM for 6 h, except for *M. smegmatis*, which was incubated for 72 h. Growth was

426 monitored by measuring optical density and normalized based on kanamycin (100% growth  
427 inhibition) and DMSO (0% growth inhibition) controls, with the exception of *P. aeruginosa*, for  
428 which 10 µg/mL tobramycin was used as the control for 100% growth inhibition. The  
429 experiments were performed with three technical replicates per plate. EC<sub>50</sub>s were calculated  
430 based on a variable-slope four-parameter nonlinear least-squares regression model in the  
431 GraphPad Prism software package (version 8).

432

### 433 **Kinetic Kill Curves**

434 Mtb was cultured in 7H9 medium to an OD<sub>600</sub> of 0.5-1.0 and diluted to an OD<sub>600</sub> of 0.1. In  
435 triplicate, diluted samples were aliquoted into 96 well plates and inoculated with 20 µM  
436 concentrations of each compound with DMSO as a negative control. Plates were placed in zip  
437 lock bags with moistened paper towels and incubated at 37 °C. Daily samples were taken and  
438 serial diluted in 96 well plates using 1x PBS + 0.05% Tween-80 (v/v) and plated on 7H10  
439 quadrant plates supplemented with OADC (10% v/v). Plates were incubated at 37°C and  
440 colonies were counted to calculate CFU/mL. Experiments were conducted in biological triplicate  
441 and repeated at least twice.

442

### 443 **Isolation of Resistant Mutants**

444 Mtb was grown to an OD<sub>600</sub> of 0.6-1.0 and samples were resuspended in fresh media for  
445 a final cell count of 2 x 10<sup>9</sup> cells/ml. Cell pellets were resuspended in 0.5 ml of 7H9 medium and  
446 plated on 7H10 OADC plates supplemented with 20 µM or 40 µM concentrations of HC2060,  
447 HC2149, HC2169, and HC2184. Plates were incubated at 37 °C until isolated colonies  
448 appeared. Colonies were picked and inoculated into 5 ml of 7H9 medium in T25 standing flasks  
449 and grown to an OD<sub>600</sub> 0.5-1.0. Samples were taken and tested for resistance using dose  
450 response curves described above along with WT grown to an OD<sub>600</sub> of 0.6-1.0 and 3 µM RIF  
451 and DMSO were used as controls. Samples were also serial diluted as described above and

452 plated for colony purified single colony isolates on X-plates containing 7H10 OADC. Single  
453 colony isolates were picked and inoculated into 5 ml of 7H9 OADC in T25 flasks. Resistance  
454 was re-confirmed using the same methods described above. Differences in EC<sub>50</sub> values were  
455 deemed significant based on the 95% confidence intervals.

456

### 457 **Whole Genome Sequencing and Analysis**

458 Whole genome sequencing was performed as previously described<sup>44</sup>. Briefly cultures of  
459 single colony isolates were grown to an OD<sub>600</sub> ~1.0 and pelleted. Genomic DNA was extracted  
460 and sequenced by Illumina-based whole genome sequencing at 250 bp reads. Sequencing  
461 results were analyzed using the GATK workflow for the identification of single nucleotide  
462 variations<sup>45</sup>.

463

### 464 **TMM and TDM accumulation assay**

465 The lipid assay was carried out as previously described(6). Briefly, 30 ml cultures of Mtb  
466 was cultured to an OD<sub>600</sub> of 0.6. Samples were diluted to an OD<sub>600</sub> of 0.1 in 8 ml cultures in T25  
467 flasks. Cultures were inoculated with 8 µCi of <sup>14</sup>C-acetate. Cultures were co-inoculated with 20  
468 µM samples of MmpL3 inhibitors and then incubated for 24 hours before performing lipid  
469 extraction as previously described<sup>9</sup>. Total extractable lipid <sup>14</sup>C-incorporation was determined by  
470 scintillation counting, and 5,000 cpm of lipids were separated on TLC plates with a 24:1:0.5  
471 Chloroform:Methanol:H<sub>2</sub>O solvent system. TLCs plates were imaged using a Typhoon FLA 7000  
472 and images were quantified using IQ image quantifying software. Experiments were conducted  
473 in biological duplicate. Comparison to the DMSO controls was conducted using the T-test.

474

### 475 **Targeted whole cell phenotypic screening**

476 Each *mmpL3* mutant was cultured independently in 8 ml of 7H9 medium in T25 standing  
477 flasks to an OD<sub>600</sub> of 0.6 – 1.0. Mutant cultures were separately back diluted to an OD<sub>600</sub> of 0.6

478 in 1.5 ml of 7H9 medium in 2 ml screw cap tubes. The contents of each tube were mixed into a  
479 single batch culture in a T75 culture flask. The mixed mutant culture was allowed to recover  
480 overnight (~8 hours) at 37°C. Samples of Mtb Erdman (WT, OD<sub>600</sub> = 0.6) and the mixed mutant  
481 population were back diluted to an OD<sub>600</sub> of 0.1 in 7H9 medium. WT and mutant pools were  
482 aliquoted, in technical duplicate, into separate clear bottom black walled 96 well plates. Samples  
483 of WT and mixed mutant cultures were inoculated with 20 µM of each of the 163 compounds  
484 from the small molecule library. Additional treatments included 0.5 µM samples of *para*-amino  
485 salicylic acid (PAS), SQ109, bedaquiline (BDQ), isoniazid (INH), clofazimine (CFZ), as well as  
486 DMSO and 0.3 µM RIF. Percent growth inhibition (%GI) of WT and mutant mix population were  
487 calculated for each treatment and hits were defined as 1) compounds with at least 15% GI in the  
488 WT background and 2) 1.5 fold decreased inhibition in the mutant pool relative to the WT  
489 background. The hit compounds were confirmed by conducting dose responses curves of  
490 screen hits as described above against WT and *mmpL3* mutant pools. Dose response curves  
491 were conducted in technical duplicate and differences between the WT and *mmpL3* mutant pool  
492 was deemed significant based on 95% confidence interval. Confirmed hits were reassessed  
493 with similar results.

494 Cross resistance studies were conducted by generating dose response curves for every  
495 combination of MmpL3 inhibitor and each *mmpL3* mutant, and WT Mtb strain, CDC1551 or  
496 Erdman depending on the background of the *mmpL3* strain (for a total of 338 dose response  
497 curves). Cross resistance dose responses were conducted singly, unless the dose response  
498 identified increased sensitivity in the *mmpL3* mutant background, in which case the responses  
499 were re-examined using dose responses carried out in biological duplicate. The dose responses  
500 were then used to calculate the area under the curve (AUC) using Prism 8 software using the  
501 default setting. AUCs were compare to the respective WT strains by dividing the AUC of the  
502 *mmpL3* strain by the respective WT parent strain. AUC fractions were then standardized by  
503 treatment by Z-scoring<sup>19</sup>. Z-score standardized data was then clustered in MatLab by



504 hierarchical agglomerative clustering using the *clustergram* function with default settings  
505 (Euclidean distance model, Average linkage clustering). Hierarchical agglomerative clustering  
506 using bootstrapped data was conducted in R using *pvclust* (nboot = 1000) using the Euclidean  
507 distance model and average linkage clustering<sup>46</sup>.

508

### 509 **Membrane Potential Assays**

510 The DiOC<sub>2</sub> membrane potential assay was carried out as previously described<sup>1, 9</sup>.  
511 Briefly, Mtb Erdman cells were labeled with 30 μM DiOC<sub>2</sub> (Thermo Scientific) in 1 ml of 1X  
512 phosphate-buffered saline (PBS) (pH 7.4), supplemented with 50 mM KCl, and incubated at  
513 37°C for 15 min. Cells were washed twice and suspended in 1X PBS at a final concentration of  
514 an OD<sub>600</sub> of 0.2, and 200 μL of labeled cells were aliquoted to 96-well plates and treated with  
515 each of the MmpL3 inhibitors at 80 μM, 20 μM, or 5 μM concentrations. Samples were also  
516 treated with DMSO (negative control) or 25 μM CCCP (Sigma-Aldrich) (positive control). Each  
517 treatment included three technical replicates per plate. The kinetics of fluorescence (excitation,  
518 485 nm; emission, 610 nm/515 nm) was measured every 2 min for 60 min. The red/green (610  
519 nm/515 nm) fluorescence intensity ratio was calculated and used to quantify membrane  
520 potential. The experiment was repeated at least twice with similar results. The error bars  
521 represent the standard deviation of the geometric mean.

522

### 523 **Bactericidal Activity *in vitro* and in macrophages**

524 An Mtb CDC1551 strain with a chromosomally encoded firefly luciferase<sup>47</sup> was grown to  
525 an OD<sub>600</sub> of 0.6 – 1.0 in rich medium. For *in vitro* experiments cultures were diluted to an OD<sub>600</sub>  
526 of 0.1 and aliquoted at 100μL in white walled 96 well plates and inoculated with compounds with  
527 each inhibitor, along with DMSO or RIF controls. The luciferase assay was carried out as  
528 previously described and plates were read on a PerkinElmer Enspire plate reader.

529 For studies in macrophages, primary bone marrow derived macrophages were  
530 harvested and infected as previously described<sup>48</sup>. Briefly, BMM $\Phi$  from C57Bl/6 mice were  
531 distributed into 96 well white plates and infected for 1 hour with a CDC1551 luciferase reporter  
532 strain<sup>47</sup>. Following 1 hour of infection, cells were treated with inhibitors ranging from 200 – 0.2  
533  $\mu$ M of MmpL3 inhibitors. 20  $\mu$ M PAS, 3  $\mu$ M RIF, and DMSO were used as controls. Samples  
534 were incubated in the 96 wells plates at 37°C + 5% CO<sub>2</sub> for 6 days before carrying monitoring  
535 bacterial survival by measuring luciferase activity. Experiments were conducted in biological  
536 triplicate and repeated at least once with similar results.

537

### 538 **Protein Modeling.**

539 The 3D structure for MmpL3 was generated using the I-TASSER server<sup>49</sup>. The MmpL3  
540 protein sequence of H37Rv from Mycobrowser (Rv0206c)<sup>50</sup> was aligned to the MmpL3 crystal  
541 structure of Msm (PDB: 6AJF) with a resulting C-score of 0.17 (TM-score 0.74  $\pm$  0.11, RMSD  
542 8.4  $\pm$  4.5Å). The resulting structure was modified to remove the C-terminal tail (732/944AA) in  
543 PyMol 2.2.3<sup>51</sup>.

544

### 545 **DiaMOND:**

546 DiaMOND analysis was carried as described by Cokol *et al.*, with modifications as  
547 described (12). Briefly concentration ranges were linearized using the equation

$$548 \quad \Delta D = \frac{M - m}{N - 1}$$

$$549 \quad \Delta D = D_N - D_{N-1}$$

550 Where  $\Delta D$  is the difference between concentrations of each dose,  $M$  is the lowest concentration  
551 to inhibit Mtb growth 100%, and  $m$  is the highest concentration estimated to confer 0% growth  
552 inhibition based on the EC<sub>50</sub> dose response curves.  $N$  is the number of doses to be used in  
553 DiaMOND. Mtb was then treated with each concentration range for each compound by itself

554 (Null treatment) at a  $[X_N]$  or in combination with another inhibitor at a  $[\frac{1}{2}X_N]$ . Dose responses  
555 were used to generate a dose response curve for each treatment which was used to interpolate  
556 the  $IC_{50}$  which was set for the observed, "o" to calculate the  $FIC_2$  ( $FIC_2 = \frac{o}{e}$ ) as previously  
557 described<sup>37</sup>. Dose responses were conducted in biological duplicate and reported  $FIC_2$  values  
558 are representative of the geometric mean of two reps.

559

### 560 **Eukaryotic Cytotoxicity**

561 Primary BMM $\Phi$  were isolated and distributed into white wall 96 well plates as described  
562 above. Cells were treated with inhibitors ranging in concentration from 200 – 0.26  $\mu$ M. Cells  
563 were incubated at 37C for 3 or 6 days with 5% CO<sub>2</sub>. Cytotoxicity was tested using the Cell Titer  
564 Glow assay kit using the methods from the provider. For a negative control cells were treated  
565 with 4% of TritonX-100 and DMSO as a positive control<sup>28</sup>.

566

### 567 **Kinetic solubility and microsomal stability assay.**

568 The kinetic solubility assay was conducted as described by Bevan *et al.*<sup>52</sup> Briefly, the assay was  
569 performed with 7-point (2-fold) dilutions from 200  $\mu$ M - 3.125  $\mu$ M for the compounds.  
570 Mebendazole, benxarotene and aspirin were also included as controls. The drug dilutions were  
571 added to PBS, pH 7.4, with the final DMSO concentration of 1%, and incubated at 37 °C for 2 h.  
572 The absorbance at 620 nm was measured for each drug dilution to estimate of the compound  
573 solubility. Three replicates were examined for each dilution. Mouse microsomal stability was  
574 conducted as described by Obach<sup>53</sup> and presented as % remaining following 30 minutes.  
575 Values greater than 100% are likely due to changes in the solubility of the compounds over the  
576 course of the assay and represent high stability in microsomes.

577

578 **Acknowledgements**

579 We thank Bree Aldridge for assistance in designing the DiaMOND studies. Christopher Colvin  
580 and Benjamin Johnson provided technical assistance in the initial prioritization of compounds.  
581 Additional technical assistance was provided by Bilal Alewei and Tom Dexheimer, in the MSU  
582 medicinal chemistry and screening cores to conduct the solubility and microsomal stability  
583 studies. Research reported in this study was supported by start-up funding from Michigan State  
584 University and AgBioResearch, and grants from the NIH-NIAID (U54AI057153, R21 AI1170181  
585 and R01AI116605), the Bill and Melinda Gates Foundation (OPP1059227), a strategic  
586 partnership grant from the MSU Foundation (14-SPG-Full-2966), and the Jean P. Schultz  
587 Endowed Biomedical Research Fund at the MSU College of Human Medicine.

588

589 **Author Contributions**

590 JW and RBA designed the experiments and wrote the manuscript; GC conducted prioritization  
591 assays; JW, EH, KC conducted the Mtb and spectrum of activity experiments; CC and TD  
592 designed and conducted the *M. abscessus* experiments; and, EE directed the solubility and  
593 microsomal stability studies. All authors reviewed the manuscript.

594

595 **Disclosures.**

596 RBA is the founder and owner of Tarn Biosciences, Inc., a company that is working to develop  
597 new TB drugs.

598

**TABLE 1 Characterization of Mmpl3 Inhibitors**

| Compound | WT EC <sub>50</sub> (μM) | <i>mmpL3</i> Mutant Pool EC <sub>50</sub> (μM) | Relative EC <sub>50</sub> | MΦ EC <sub>50</sub> | Δψ Disruption | Cytotoxicity (CC <sub>50</sub> ) (μM) | Solubility (μM) | Microsome Stability (% remain 30 min) |
|----------|--------------------------|------------------------------------------------|---------------------------|---------------------|---------------|---------------------------------------|-----------------|---------------------------------------|
| HC2032   | 2.2                      | >80                                            | >36                       | 0.8                 | Yes           | >100                                  | 18              | 102                                   |
| HC2060   | 16.9                     | >80                                            | >5                        | 4.1                 | No            | >100                                  | >300            | 44                                    |
| HC2091   | 6.2                      | >80                                            | >13                       | 2.2                 | No            | >100                                  | >300            | 45                                    |
| HC2099   | 1.7                      | 38.9                                           | 23                        | <0.3                | No            | >100                                  | 178             | 71                                    |
| HC2134   | 1.4                      | >80                                            | >57                       | 7.3                 | Yes           | >100                                  | 116             | N.D.                                  |
| HC2138   | 4.0                      | >80                                            | >20                       | <0.3                | Yes           | >100                                  | 66              | 122                                   |
| HC2149   | 6.6                      | >80                                            | >12                       | 3.6                 | Yes           | >100                                  | 131             | 138                                   |
| HC2169   | 1.8                      | >80                                            | >44                       | <0.3                | No            | >100                                  | 17              | 168                                   |
| HC2178   | 3.8                      | >80                                            | >24                       | 2.0                 | Yes           | >100                                  | >200            | 4                                     |
| HC2183   | 3.2                      | 59.9                                           | 19                        | 3.0                 | No            | >100                                  | >200            | 25                                    |
| HC2184   | 7.6                      | >80                                            | >11                       | 0.7                 | Yes           | >100                                  | >300            | 30                                    |
| C215     | 11.2                     | 57.5                                           | 5                         | 4.0                 | Yes           | 14.3                                  | 87              | 62                                    |
| SQ109    | 2.4                      | 6.9                                            | 2                         | <0.3                | Yes           | N.D.                                  | N.D.            | N.D.                                  |

N.D. – Not determined

Relative EC<sub>50</sub> is fold difference between WT vs. *mmpL3* mutant pool.

599

600

**TABLE 2 EC<sub>50</sub> Values for Spectrum of Activity of Mmpl3 Inhibitors**

|                      | HC2032            | HC2060            | HC2091            | HC2099            | HC2134            | HC2138           | HC2149           | HC2169           | HC2178            | HC2184           | C215             |
|----------------------|-------------------|-------------------|-------------------|-------------------|-------------------|------------------|------------------|------------------|-------------------|------------------|------------------|
| Mtb – Erdman         | 3.0               | 14.8              | 7.0               | 5.3               | 2.1               | 2.3              | 11               | 2.4              | 3.7               | 8.9              | 16.2             |
| Mtb – CDC1551        | 2.4               | 12.8              | 6.3               | 4.8               | 1.5               | 2.0              | 10.5             | 2.2              | 2.3               | 7.6              | 14.3             |
| Mab                  | 34.5 <sup>a</sup> | 13.6 <sup>a</sup> | 96.5 <sup>a</sup> | 81.8 <sup>a</sup> | 81.9 <sup>a</sup> | 8.2 <sup>a</sup> | -28 <sup>a</sup> | -36 <sup>a</sup> | 13.5 <sup>a</sup> | 7.0 <sup>a</sup> | 2.3 <sup>a</sup> |
| Msm                  | 2.2               | 80                | 20 <sup>9</sup>   | 0.9               | 1.8               | N.D.             | >200             | 13.2             | 4.5               | 85.7             | >200             |
| <i>S. aureus</i> (1) | >200              | >200              | >200 <sup>9</sup> | >200              | 51.0              | N.D.             | >200             | >200             | >200              | >200             | 15.1             |
| <i>S. aureus</i> (2) | >200              | >200              | >200 <sup>9</sup> | >200              | 51.8              | N.D.             | >200             | >200             | >200              | >200             | 22.8             |
| <i>E. coli</i>       | >200              | >200              | >200 <sup>9</sup> | >200              | >200              | N.D.             | >200             | >200             | >200              | >200             | >200             |
| <i>P. vulgaris</i>   | >200              | >200              | >200 <sup>9</sup> | >200              | 35.1              | N.D.             | >200             | >200             | >100              | >200             | >200             |
| <i>E. faecalis</i>   | >200              | >200              | >200 <sup>9</sup> | >200              | >200              | N.D.             | >200             | >200             | >200              | >200             | 34               |
| <i>P. aeruginosa</i> | >200              | >200              | >200 <sup>9</sup> | >200              | >200              | N.D.             | >200             | >200             | >200              | >200             | >200             |

\*All values are EC<sub>50</sub> except for *M. abscessus* data which are single concentration % inhibition data

a – Growth Inhibition (%) at 20μM

9 – Reference number of previously published data

Mab, *M. abscessus*; Msm, *M. smegmatis*

*S. aureus* (1) – *S. aureus* ATCC29213, *S. aureus* (2) – *S. aureus* ATCC25923

N.D. – not determined

601

602

603 **Figure Legends**

604 **Figure 1: Four compounds inhibit Mtb growth in a dose and time dependent manner. a)**

605 Structures of HC2060, HC2149, HC2169 and HC2184. **b)** Inhibition of Mtb growth in a dose  
606 dependent manner. **c)** Killing of Mtb in a time dependent manner when treated at 20 $\mu$ M of the  
607 inhibitors. Error bars indicate the standard deviation from the mean. Experiments were  
608 conducted in biological triplicate.

609

610 **Figure 2: Modulation of TMM and TDM accumulation. a)** Whole cell <sup>14</sup>C-lipids from Mtb

611 treated with 20 $\mu$ M of HC2060, HC2149, HC2169 and HC2184 show increased levels of TMM  
612 and decreased levels of TDM. **b and c)** Whole cell <sup>14</sup>C-lipid from Mtb treated with 20 $\mu$ M of the  
613 six inhibitors identified by the targeted phenotypic screen show increased levels of TMM and  
614 decreased levels of TDM. Experiments were conducted in biological duplicate. In both  
615 experiments Mtb samples were treated with DMSO or 20 $\mu$ M SQ109. Error bars indicate the  
616 standard deviation. p-value < 0.05 (\*), <0.005 (\*\*), <0.001 (\*\*\*).  $\blacklozenge$  indicates values that just  
617 missed the cut off, HC2134 TMM p-value = 0.07. HC2060 and HC2149 missed significance  
618 cutoffs, but this may be due to the high variability in reps as the relative there was a >2 fold in  
619 difference for HC2060 and HC2149.

620

621 **Figure 3: A targeted whole cell phenotypic screen identifies six new MmpL3 inhibitors. a)**

622 Results of a direct head to head comparison of percent growth inhibition of WT Mtb or a pooled  
623 *mmpL3* mutant population treated with 20 $\mu$ M of 163 compounds. Additional treatments included  
624 0.5 $\mu$ M of BDQ, CFZ, INH, PAS, SQ109 or 0.03% H<sub>2</sub>O<sub>2</sub>. Examples of hit compounds with  
625 reduced activity in the MmpL3 mutant pool are shown in red. **b)** Structures of the confirmed hits  
626 from the screen, including six new compounds HC2032, HC2099, HC2134, HC2138, HC2178,

627 and HC2183. Previously described compounds include C215, HC2091 and SQ109 . Radio-  
628 TLCs are shown in Supplemental Figure 3.

629

630 **Figure 4: Cross resistance profiling identifies clustering of compounds and mutations.**

631 Cluster analysis of cross-resistance profiling of twenty-four *mmpL3* strains treated with each of  
632 the thirteen MmpL3 inhibitor normalized by Z-scoring by treatment. Compounds clustered into  
633 two clades: Clade A and Clade B. Mutant strains, denoted by amino acid substitution, clustered  
634 into two clades: Clade I and Clade II. Colors are based on Z-score normalization of treatment,  
635 green indicates when treatments were less effective and red indicates when treatments were  
636 more effective than the average (black). n.s. indicates a branch where the approximate  
637 unbiased (AU) value was < 75. All other branches were significant based on bootstrap AU  
638 values > 75.

639

640 **Figure 5: DiaMOND Analysis Identifies Additive, Synergistic and Antagonist Inhibitor**

641 **Interactions.** Hierarchical cluster analysis of DiaMOND-based pairwise inhibitor interactions of  
642 all combinations of MmpL3 inhibitors and RIF identifies additive ( $FIC_2$  0.82-1.18) antagonistic  
643 ( $FIC_2 > 1.18$ ) and synergistic ( $FIC_2 < 0.82$ ) interactions.

644

645 **Figure 6: Mutation substitutions cluster according to cross resistance clades. a-d)** Front,

646 back, top, and bottom (respectively) views of an I-TASSER predicted structure of Mtb MmpL3  
647 based on *M. smegmatis* MmpL3 structure (PDB: 6AJH). Substitutions conferred by mutations in  
648 *mmpL3*. Substitutions are colored based on clade from cross resistance profiling, Clade I  
649 substitutions (green), Clade II substitutions (red), or M649 (blue) which fell into both clades  
650 depending on substitution. The model shows a truncated version (732/944aa) of the MmpL3  
651 protein lacking the C-terminal tail.

652 **References**

- 653 1. Foss MH, *et al.* Diphenylether-Modified 1,2-Diamines with Improved Drug Properties for  
654 Development against Mycobacterium tuberculosis. *ACS infectious diseases* **2**, 500-508  
655 (2016).
- 656  
657 2. Grzegorzewicz AE, *et al.* Inhibition of mycolic acid transport across the Mycobacterium  
658 tuberculosis plasma membrane. *Nature chemical biology* **8**, 334-341 (2012).
- 659  
660 3. La Rosa V, *et al.* MmpL3 is the cellular target of the antitubercular pyrrole derivative  
661 BM212. *Antimicrob Agents Chemother* **56**, 324-331 (2012).
- 662  
663 4. Lun S, *et al.* Indoleamides are active against drug-resistant Mycobacterium tuberculosis.  
664 *Nat Commun* **4**, 2907 (2013).
- 665  
666 5. Remuinan MJ, *et al.* Tetrahydropyrazolo[1,5-a]pyrimidine-3-carboxamide and N-benzyl-  
667 6',7'-dihydrospiro[piperidine-4,4'-thieno[3,2-c]pyran] analogues with bactericidal efficacy  
668 against Mycobacterium tuberculosis targeting MmpL3. *Plos One* **8**, e60933 (2013).
- 669  
670 6. Shetty A, *et al.* Novel Acetamide Indirectly Targets Mycobacterial Transporter MmpL3 by  
671 Proton Motive Force Disruption. *Front Microbiol* **9**, (2018).
- 672  
673 7. Stanley SA, *et al.* Identification of novel inhibitors of M. tuberculosis growth using whole  
674 cell based high-throughput screening. *ACS Chem Biol* **7**, 1377-1384 (2012).
- 675  
676 8. Tahlan K, *et al.* SQ109 targets MmpL3, a membrane transporter of trehalose  
677 monomycolate involved in mycolic acid donation to the cell wall core of Mycobacterium  
678 tuberculosis. *Antimicrob Agents Chemother* **56**, 1797-1809 (2012).
- 679  
680 9. Zheng HQ, Williams JT, Coulson GB, Haiderer ER, Abramovitch RB. HC2091 Kills  
681 Mycobacterium tuberculosis by Targeting the MmpL3 Mycolic Acid Transporter.  
682 *Antimicrob Agents Ch* **62**, (2018).
- 683  
684 10. Dupont C, *et al.* A new piperidinol derivative targeting mycolic acid transport in  
685 Mycobacterium abscessus. *Mol Microbiol* **101**, 515-529 (2016).
- 686  
687 11. Rao SPS, *et al.* Indolcarboxamide Is a Preclinical Candidate for Treating Multidrug-  
688 Resistant Tuberculosis. *Science Translational Medicine* **5**, (2013).
- 689  
690 12. Zhang B, *et al.* Crystal Structures of Membrane Transporter MmpL3, an Anti-TB Drug  
691 Target. *Cell* **176**, 636-648 e613 (2019).

692



- 693 13. Chim N, *et al.* The Structure and Interactions of Periplasmic Domains of Crucial MmpL  
694 Membrane Proteins from Mycobacterium tuberculosis. *Chem Biol* **22**, 1098-1107 (2015).
- 695
- 696 14. Li W, *et al.* Therapeutic Potential of the Mycobacterium tuberculosis Mycolic Acid  
697 Transporter, MmpL3. *Antimicrob Agents Chemother* **60**, 5198-5207 (2016).
- 698
- 699 15. Xu ZJ, Meshcheryakov VA, Poce G, Chng SS. MmpL3 is the flippase for mycolic acids in  
700 mycobacteria. *P Natl Acad Sci USA* **114**, 7993-7998 (2017).
- 701
- 702 16. Yamaro-Botte Y, *et al.* Acetylation of trehalose mycolates is required for efficient  
703 MmpL-mediated membrane transport in Corynebacterineae. *ACS Chem Biol* **10**, 734-  
704 746 (2015).
- 705
- 706 17. Belardinelli JM, *et al.* Structure-Function Profile of MmpL3, the Essential Mycolic Acid  
707 Transporter from Mycobacterium tuberculosis. *ACS infectious diseases* **2**, 702-713  
708 (2016).
- 709
- 710 18. Varela C, *et al.* MmpL genes are associated with mycolic acid metabolism in  
711 mycobacteria and corynebacteria. *Chem Biol* **19**, 498-506 (2012).
- 712
- 713 19. Degiacomi G, *et al.* Essentiality of mmpL3 and impact of its silencing on Mycobacterium  
714 tuberculosis gene expression. *Sci Rep* **7**, 43495 (2017).
- 715
- 716 20. Li W, *et al.* MmpL3 as a Target for the Treatment of Drug-Resistant Nontuberculous  
717 Mycobacterial Infections. *Front Microbiol* **9**, 1547 (2018).
- 718
- 719 21. McNeil MB, Dennison D, Parish T. Mutations in MmpL3 alter membrane potential,  
720 hydrophobicity and antibiotic susceptibility in Mycobacterium smegmatis. *Microbiology*  
721 **163**, 1065-1070 (2017).
- 722
- 723 22. Lamichhane G, Tyagi S, Bishai WR. Designer arrays for defined mutant analysis to  
724 detect genes essential for survival of Mycobacterium tuberculosis in mouse lungs. *Infect*  
725 *Immun* **73**, 2533-2540 (2005).
- 726
- 727 23. Griffin JE, Gawronski JD, Dejesus MA, Ioerger TR, Akerley BJ, Sassetti CM. High-  
728 resolution phenotypic profiling defines genes essential for mycobacterial growth and  
729 cholesterol catabolism. *PLoS Pathog* **7**, e1002251 (2011).
- 730
- 731 24. Sacksteder KA, Protopopova M, Barry CE, 3rd, Andries K, Nacy CA. Discovery and  
732 development of SQ109: a new antitubercular drug with a novel mechanism of action.  
733 *Future Microbiol* **7**, 823-837 (2012).

- 735 25. Lee BS, Pethe K. Therapeutic potential of promiscuous targets in Mycobacterium  
736 tuberculosis. *Current Opinion in Pharmacology* **42**, 22-26 (2018).  
737
- 738 26. Li W, *et al.* Novel insights into the mechanism of inhibition of MmpL3, a target of multiple  
739 pharmacophores in Mycobacterium tuberculosis. *Antimicrob Agents Chemother* **58**,  
740 6413-6423 (2014).  
741
- 742 27. Poce G, Consalvi S, Biava M. MmpL3 Inhibitors: Diverse Chemical Scaffolds Inhibit the  
743 Same Target. *Mini Rev Med Chem* **16**, 1274-1283 (2016).  
744
- 745 28. Zheng H, *et al.* Inhibitors of Mycobacterium tuberculosis DosRST signaling and  
746 persistence. *Nature chemical biology* **13**, 218-225 (2017).  
747
- 748 29. Johnson BK, Colvin CJ, Needle DB, Mba Medie F, Champion PA, Abramovitch RB. The  
749 Carbonic Anhydrase Inhibitor Ethoxzolamide Inhibits the Mycobacterium tuberculosis  
750 PhoPR Regulon and Esx-1 Secretion and Attenuates Virulence. *Antimicrob Agents*  
751 *Chemother* **59**, 4436-4445 (2015).  
752
- 753 30. Coulson GB, *et al.* Targeting Mycobacterium tuberculosis Sensitivity to Thiol Stress at  
754 Acidic pH Kills the Bacterium and Potentiates Antibiotics. *Cell chemical biology* **24**, 993-  
755 1004 e1004 (2017).  
756
- 757 31. loerger TR, *et al.* Identification of new drug targets and resistance mechanisms in  
758 Mycobacterium tuberculosis. *PLoS One* **8**, e75245 (2013).  
759
- 760 32. Aggarwal D, Gupta A, Janmeja AK, Bhardwaj M. Evaluation of tuberculosis-associated  
761 chronic obstructive pulmonary disease at a tertiary care hospital: A case-control study.  
762 *Lung India* **34**, 415-419 (2017).  
763
- 764 33. Garcia-Garcia V, Oldfield E, Benaim G. Inhibition of Leishmania mexicana Growth by the  
765 Tuberculosis Drug SQ109. *Antimicrob Agents Chemother* **60**, 6386-6389 (2016).  
766
- 767 34. Biava M, Porretta GC, Manetti F. New derivatives of BM212: A class of  
768 antimycobacterial compounds based on the pyrrole ring as a scaffold. *Mini-Rev Med*  
769 *Chem* **7**, 65-78 (2007).  
770
- 771 35. Ballell L, *et al.* Fueling open-source drug discovery: 177 small-molecule leads against  
772 tuberculosis. *ChemMedChem* **8**, 313-321 (2013).  
773
- 774 36. Colan SD. The Why and How of Z Scores. *Journal of the American Society of*  
775 *Echocardiography* **26**, 38-40 (2013).  
776

- 777 37. Cokol M, Kuru N, Bicak E, Larkins-Ford J, Aldridge BB. Efficient measurement and  
778 factorization of high-order drug interactions in Mycobacterium tuberculosis. *Sci Adv* **3**,  
779 e1701881 (2017).
- 780  
781 38. Li W, Sanchez-Hidalgo A, Jones V, de Moura VC, North EJ, Jackson M. Synergistic  
782 Interactions of MmpL3 Inhibitors with Antitubercular Compounds In Vitro. *Antimicrob*  
783 *Agents Chemother* **61**, (2017).
- 784  
785 39. Chen P, Gearhart J, Protopopova M, Einck L, Nacy CA. Synergistic interactions of  
786 SQ109, a new ethylene diamine, with front-line antitubercular drugs in vitro. *J Antimicrob*  
787 *Chemother* **58**, 332-337 (2006).
- 788  
789 40. Su CC, Klenotic P, Bolla JR, Purdy G, Robinson C, Yu E. MmpL3 is a lipid transporter  
790 that binds trehalose monomycolate and phosphatidylethanolamine. *bioRxiv*  
791 [doi.org/10.1101/531160](https://doi.org/10.1101/531160), (2019).
- 792  
793 41. Zhang B, *et al.* Crystal Structures of Membrane Transporter MmpL3, an Anti-TB Drug  
794 Target. *Cell* **176**, 636-+ (2019).
- 795  
796 42. Bollenbach T. Antimicrobial interactions: mechanisms and implications for drug  
797 discovery and resistance evolution. *Curr Opin Microbiol* **27**, 1-9 (2015).
- 798  
799 43. Singh N, Yeh PJ. Suppressive drug combinations and their potential to combat antibiotic  
800 resistance. *J Antibiot* **70**, 1033-1042 (2017).
- 801  
802 44. Baker JJ, Abramovitch RB. Genetic and metabolic regulation of Mycobacterium  
803 tuberculosis acid growth arrest. *Sci Rep* **8**, 4168 (2018).
- 804  
805 45. McKenna A, *et al.* The Genome Analysis Toolkit: a MapReduce framework for analyzing  
806 next-generation DNA sequencing data. *Genome Res* **20**, 1297-1303 (2010).
- 807  
808 46. Suzuki R, Shimodaira H. Pvcust: an R package for assessing the uncertainty in  
809 hierarchical clustering. *Bioinformatics* **22**, 1540-1542 (2006).
- 810  
811 47. Andreu N, *et al.* Optimisation of bioluminescent reporters for use with mycobacteria.  
812 *PLoS One* **5**, e10777 (2010).
- 813  
814 48. Johnson BK, Abramovitch RB. Macrophage Infection Models for Mycobacterium  
815 tuberculosis. *Methods Mol Biol* **1285**, 329-341 (2015).
- 816  
817 49. Yang J, Zhang Y. I-TASSER server: new development for protein structure and function  
818 predictions. *Nucleic Acids Res* **43**, W174-181 (2015).
- 819

- 820 50. Kapopoulou A, Lew JM, Cole ST. The MycoBrowser portal: a comprehensive and  
821 manually annotated resource for mycobacterial genomes. *Tuberculosis (Edinb)* **91**, 8-13  
822 (2011).
- 823  
824 51. Schrodinger LLC. The PyMOL Molecular Graphics System, Version 2.2. (ed^(eds)  
825 (2015).
- 826  
827 52. Bevan CD, Lloyd RS. A high-throughput screening method for the determination of  
828 aqueous drug solubility using laser nephelometry in microtiter plates. *Analytical*  
829 *chemistry* **72**, 1781-1787 (2000).
- 830  
831 53. Obach RS. Prediction of human clearance of twenty-nine drugs from hepatic microsomal  
832 intrinsic clearance data: An examination of in vitro half-life approach and nonspecific  
833 binding to microsomes. *Drug Metab Dispos* **27**, 1350-1359 (1999).
- 834  
835

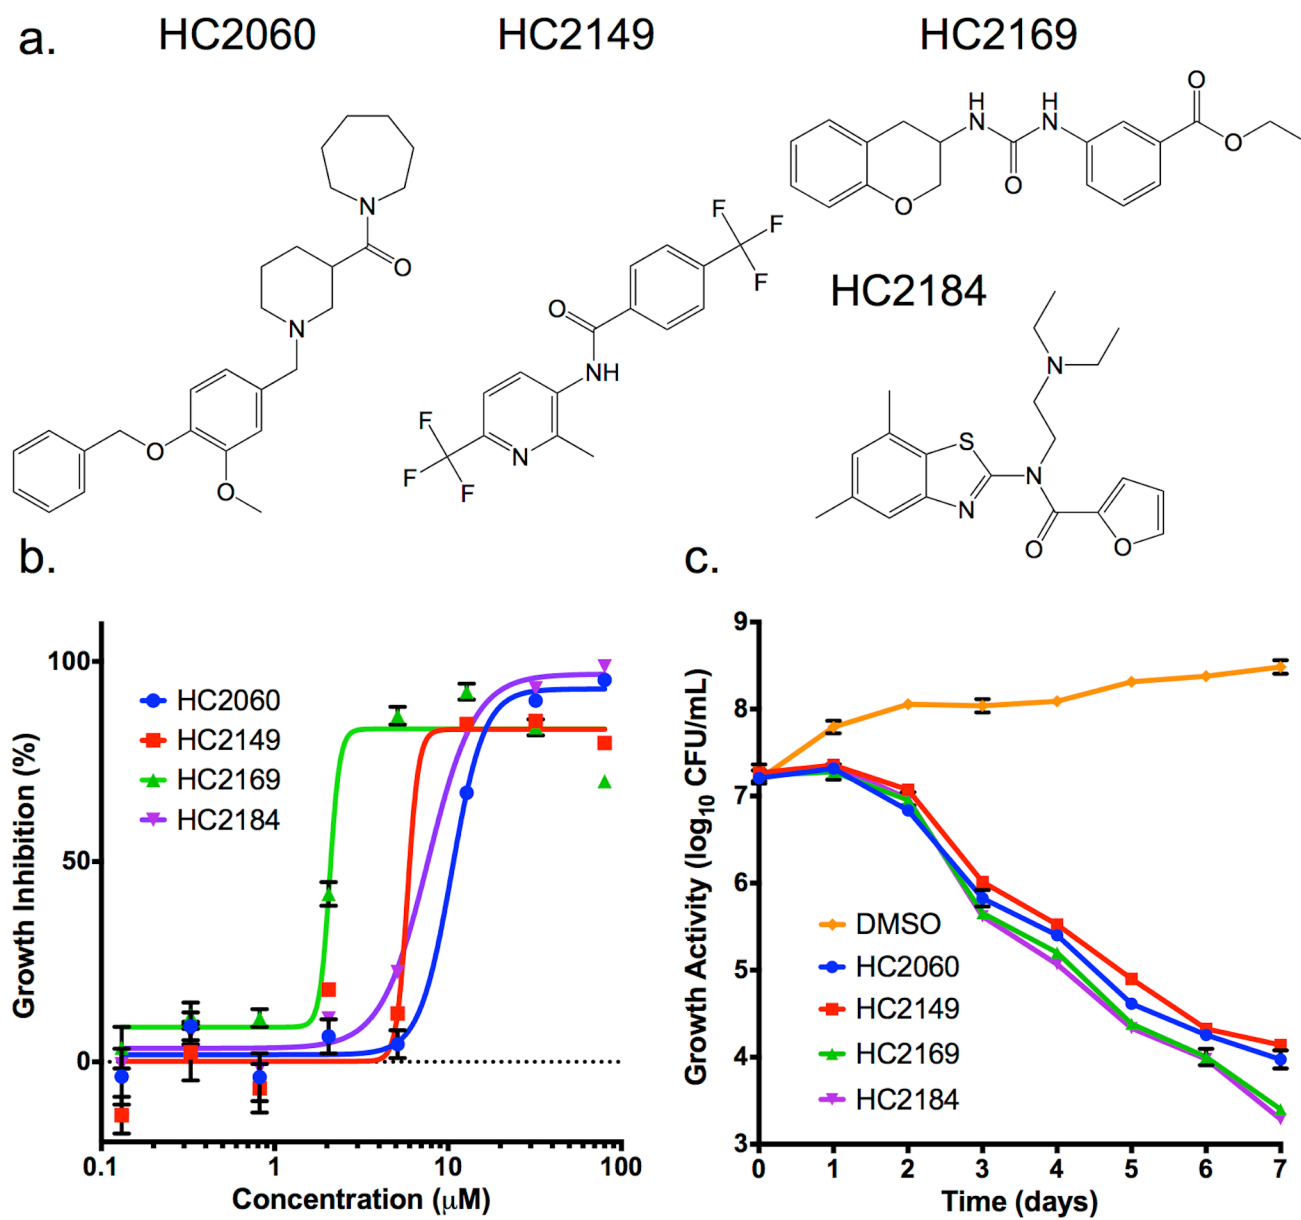

Figure 1

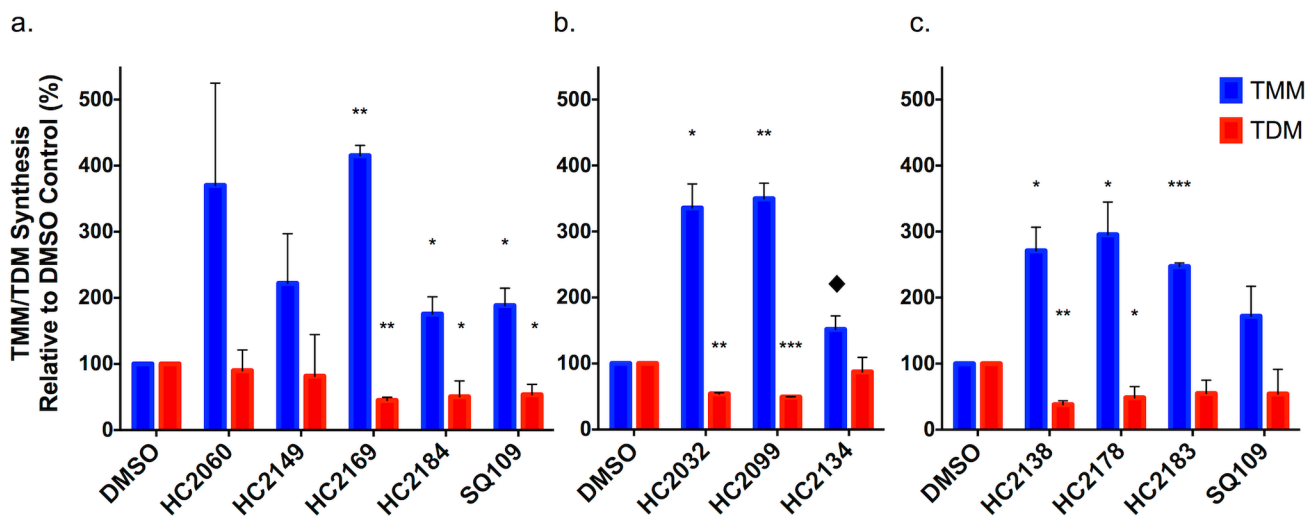

Figure 2

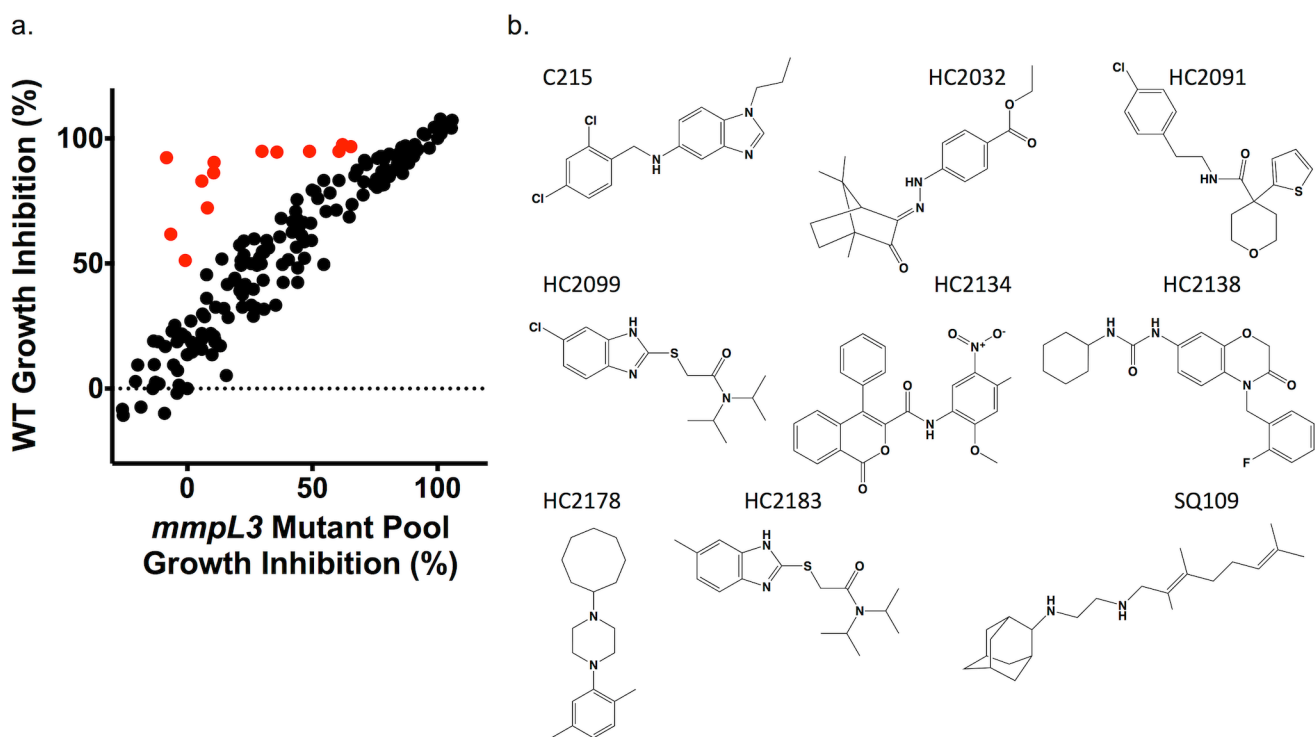

Figure 3

## Z-score

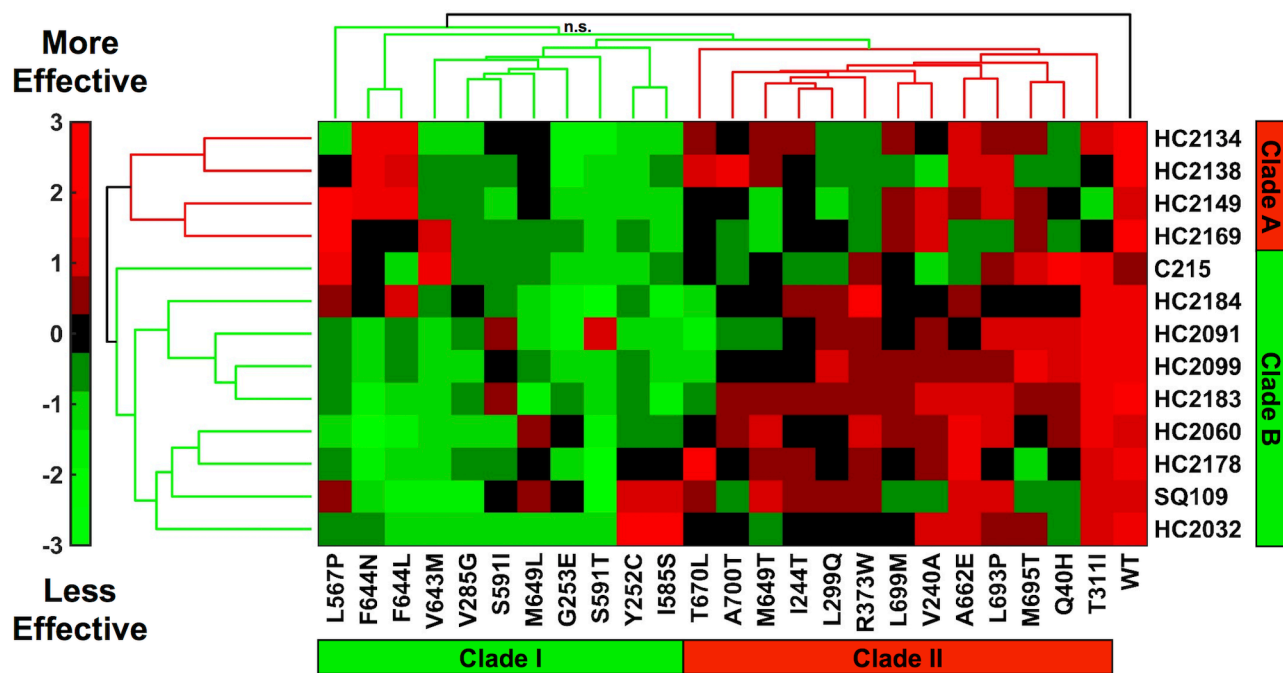

Figure 4



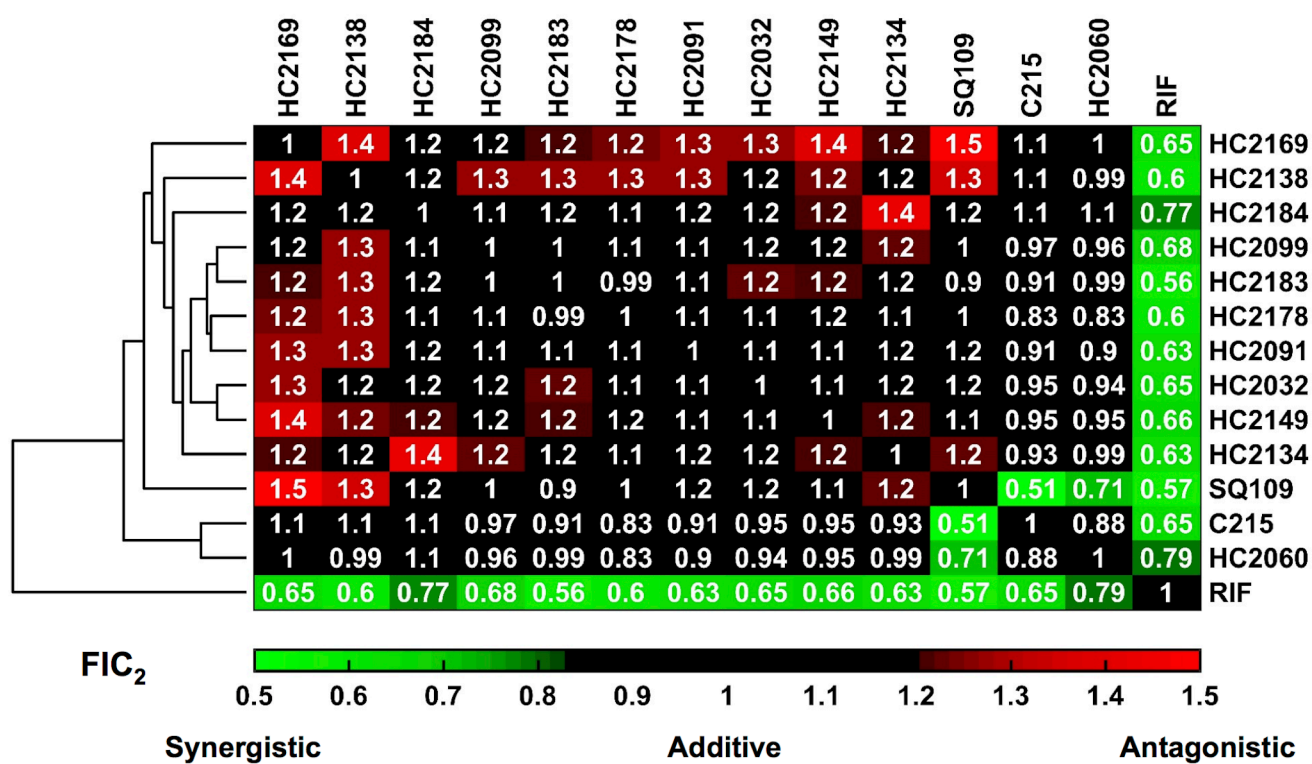

Figure 5

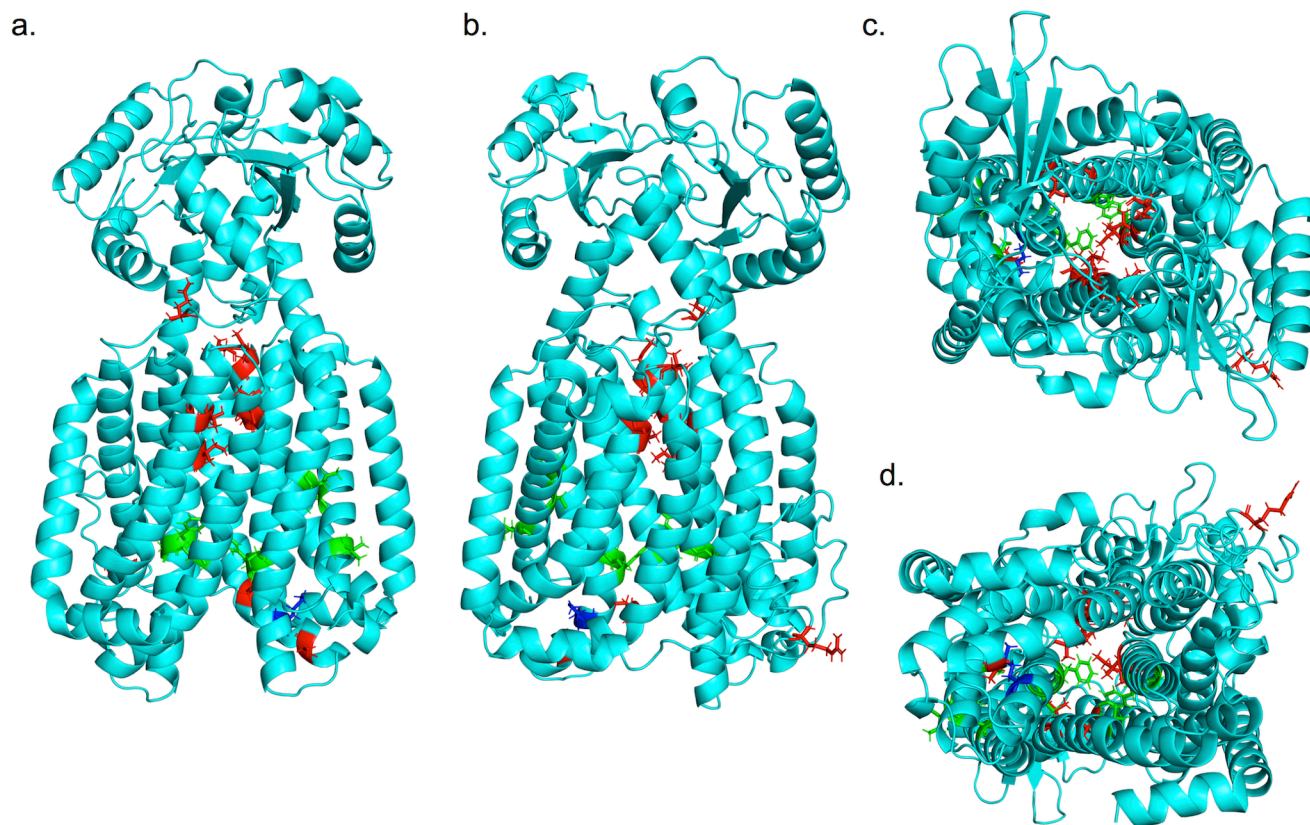

Figure 6

## Supplemental Methods for *M. abscessus* spectrum of activity assays

**Bacterial strains and culture media.** For screens and hit confirmation, *Mycobacterium abscessus* Bamboo was used. *M. abscessus* Bamboo was isolated from the sputum of a patient with amyotrophic lateral sclerosis and bronchiectasis and was provided by Wei Chang Huang, Taichung Veterans General Hospital, Taichung, Taiwan. *M. abscessus* Bamboo whole genome sequencing showed that the strains belongs to *M. abscessus* subsp. *abscessus* and harbors an inactive clarithromycin-sensitive *erm* C28 sequevar (GenBank accession no. [MVDX00000000](#)). *M. abscessus* Bamboo cultures were grown in standard mycobacterium medium, Middlebrook 7H9 broth (BD Difco) supplemented with 0.5% albumin, 0.2% glucose, 0.085% sodium chloride, 0.0003% catalase, 0.2% glycerol, and 0.05% Tween 80. Solid cultures were grown on Middlebrook 7H10 agar (BD Difco) supplemented with 0.5% albumin, 0.2% glucose, 0.085% sodium chloride, 0.5% glycerol, 0.0003% catalase, and 0.006% oleic acid.

**Single-point growth inhibition screening assay.** The compound library was screened in microtiter plates as previously described with minor modifications. Briefly, the screen was carried out in 96-well flat-bottom Corning Costar plates at a single-point concentration of 20  $\mu$ M with a starting inoculum of an optical density at 600 nm ( $OD_{600}$ ) of 0.05 ( $10^7$  CFU/ml) in a final volume of 200  $\mu$ l. The culture for the starting inoculum was diluted from a preculture at mid-log phase ( $OD_{600}$ , 0.4 to 0.6). The plates were sealed using a Breathe-Easy sealing membrane (Sigma-Aldrich), put in an airtight container with moist tissue, and incubated for 3 days at 37°C on an orbital shaker at 110 rpm. Each plate had a medium-only control and a drug-free control, as well as positive control, clarithromycin at 20  $\mu$ M. After 3 days of incubation, the cultures in the wells were manually resuspended before the  $OD_{600}$  was read in a TECAN Infinite Pro 200 plate reader. Compounds were scored according to their growth inhibition of the treated culture compared to the untreated culture (DMSO-treated). The experiment was conducted in duplicate, and the

results are shown as a scatter plot, with each data point representing the mean of data from the two replicates for each compound (Fig. 1).

**Growth inhibition dose-response assay.** MICs in dose-response assays were determined by the broth microdilution method as described previously (63), with some modifications. Briefly, 96-well plates were filled with 100  $\mu$ l of 7H9 medium in each well. Two times the desired two-fold (10 points) serial dilutions of compounds were prepared with TECAN D300e Digital Dispenser. An appropriate dilution of a mid-log-phase culture to an OD<sub>600</sub> of 0.1 (final OD<sub>600</sub> in all wells was 0.05) was carried out, and 100  $\mu$ l of the bacterial culture was added to the wells. The plates were incubated at 37°C and 110 rpm on an orbital shaker for 3 days and then manually resuspended, and the OD<sub>600</sub> was measured using the plate reader. We report MIC<sub>50</sub>s and MIC<sub>90</sub>s which are the concentrations that inhibit 50% and 90% of growth respectively compared to the untreated control. The MIC<sub>90</sub>s correspond to the standard “no visible growth” MICs. All experiments were carried with biological replicates as well as technical replicates.

## Supplemental Figure Legends

**Figure S1: Prioritization funnel of growth inhibitors from a high throughput screen.** A high throughput screen of 273,000 compounds identified 1087 compounds that inhibit Mtb growth independent of the targeted two component regulators at 10  $\mu$ M. These compounds were further tested as being able to inhibit Mtb growth (confirmed hits), have low eukaryotic cytotoxicity (<10%), able to inhibit intracellular Mtb growth (>25%) resulting in 216 compounds that meet the minimum requirements. Of the 216 compounds 163 commercially available compounds were purchased as fresh powders.

**Figure S2: Resistant Mutants to Four Novel Inhibitors Map to mmpL3.** a-d) Dose response curves of resistance mutant to four novel Mtb growth inhibitors. Curves are based on 2.5 dilutions of inhibitors ranging from 80 to 0.13 $\mu$ M. Experiments were conducted in triplicate and the error bars indicated the standard deviation of the mean. e) Transmembrane domain map shows diversity of substitutions conferred by mutations in mmpL3. Transmembrane domain map is based on Phyre2 analysis of H37Rv MmpL3 protein sequence. f) Venn Diagram identifies novel MmpL3 substitutions identified in this study. A total of 21 MmpL3 amino acid substitutions were identified in this study, including 14 novel substitutions and 7 previously identified substitutions (see TABLE S1 for list of substations).

**Figure S3. TLCs show TMM/TDM Modulation.** a-c) Mtb cells were grown in the presence of 8 $\mu$ Ci of <sup>14</sup>C-acetate for twenty four hours and treated with 20 $\mu$ M of **a)** the four prioritized inhibitors (HC2060, HC2149, HC2169 or HC2184) or **b and c)** the six inhibitors identified from the targeted mutant phenotypic screen (HC2032, HC2099, HC2134, HC2138, HC2178, HC2183). Lipids were isolated from whole cell extracts and analyzed by TLC. In each experiment samples of cells were also treated with either 20 $\mu$ M of SQ109 or DMSO.

**Figure S4. Illustrated Outline of Targeted Mutant Phenotypic Screen.** **a)** Growth inhibition of a pooled culture of twenty four unique *mmpL3* mutant strains of Mtb (multicolored suns) is directly compared with WT Mtb strains. Samples of either pooled *mmpL3* mutant strains or WT Mtb are aliquoted into separate 96 well plates and treated with 163 prioritized Mtb growth inhibitors, as well as BDQ, CFZ, INH, PAS, SQ109 and H<sub>2</sub>O<sub>2</sub>. Growth inhibition (%) is calculated as the growth inhibition relative to the DMSO and RIF controls. **b)** Beehive plot of relative fold decrease in activity of compounds in the mixed *mmpL3* mutant background compared to WT treated cells. Dotted line indicates a 1.5 fold resistance in the *mmpL3* mixed mutant background relative to the WT. Error bars (red) indicate the 95% confidence interval of the geometric mean.

**Figure S5. 13 Dose response curves of thirteen proposed MmpL3 inhibitors on pooled mmpL3 mutant strains.** **a-m)** Dose response curves of thirteen Mtb growth inhibitors confirmed to have reduced activity in the pooled *mmpL3* mutant background (red) compared to WT Mtb (blue). Samples were treated with a series of (2.5 fold dilutions) of each inhibitor ranging from 80µM to 0.13µM. Growth inhibition (%) is calculated as the growth inhibition relative to the DMSO and RIF controls. Experiments were conducted in triplicate and error bars indicate the standard deviation from the mean.

**Figure S6. Impact of Non-MmpL3 inhibitors on pooled mmpL3 mutant strains.** Dose response curves of thirteen Mtb growth inhibitors confirmed to have reduced activity in the pooled *mmpL3* mutant background (red) compared to WT Mtb (blue). Samples were treated with a series of (2.5 fold dilutions) of each inhibitor ranging from 80µM to 0.13µM. Growth inhibition (%) is calculated as the growth inhibition relative to the DMSO and RIF controls. Samples were run in triplicate and error bars indicate the standard deviation from the mean.

**Figure S7. Capacity of Inhibitors to Disrupt Membrane Potential.** **a-m)** Mtb cells labeled with DiOC2 and treated with 80µM (blue circle), 20µM (red square) or 5µM (green triangle) of each of the thirteen MmpL3 inhibitors for one hour. As controls DMSO (negative, purple inverted triangles)

and CCCP (positive, orange diamonds) treatments were also included. Experiments were carried out using the DiOC<sub>2</sub> membrane potential assay kit. The experiment was repeated twice with similar results. Data points are the geometric mean of three technical repeats. Error bars indicate the geometric standard deviation of three technical replicates. The experiment was repeated with similar results.

**Figure S8. Bactericidal activity of MmpL3 Inhibitors.** Mtb CDC1551 luc reporter strains were treated with a series of dilutions (2.5 fold) from 80 to 0.13 $\mu$ M of each of the thirteen MmpL3 inhibitors for six days in vitro. Cells were then tested for luciferase expression using the Bright-Glo Luciferase assay kit. Growth inhibition (%) is the normalized luciferase activity relative to the DMSO – positive and RIF – negative controls. Experiments were conducted in triplicate and the error bars indicated the standard deviation of the mean.

**Figure S9. Impact of MmpL3 Inhibitors on Intracellular Growth.** Primary bone marrow macrophages were infected with Mtb CDC1551 luc reporter strains. Infected macrophages were treated with a series of dilutions (2.5 fold) from 200 to 0.3 $\mu$ M of each of the thirteen MmpL3 inhibitors for six days in vitro. Cells were then tested for luciferase expression using the Bright-Glo Luciferase assay kit. Growth inhibition (%) is the normalized luciferase activity relative to the DMSO – positive and RIF – negative controls. Experiments were conducted in triplicate and the error bars indicated the standard deviation of the mean.

**Figure S10. Clade substitutions Differ in Proximity to Essential Residues. a-d)** Front, back, top, and bottom (respectively) views of an I-TASSER predicted structure of Mtb MmpL3 based on MmpL3 structure of Msm (PDB: 6AJH). Substitutions conferred by mutations in *mmpL3*. Substitutions are colored based on clade from cross resistance profiling, Clade I substitutions (green), Clade II substitutions (red), or M649 (blue) which fell into both clades depending on substitution. Yellow spheres indicate the seven essential residues (D251, S288, G543, D640,

Y641, D710, and R715) for MmpL3 activity identified by Bellardinelli and colleagues<sup>17</sup>. The model shows a truncated version (732/944aa) of the MmpL3 protein lacking the C-terminal tail.



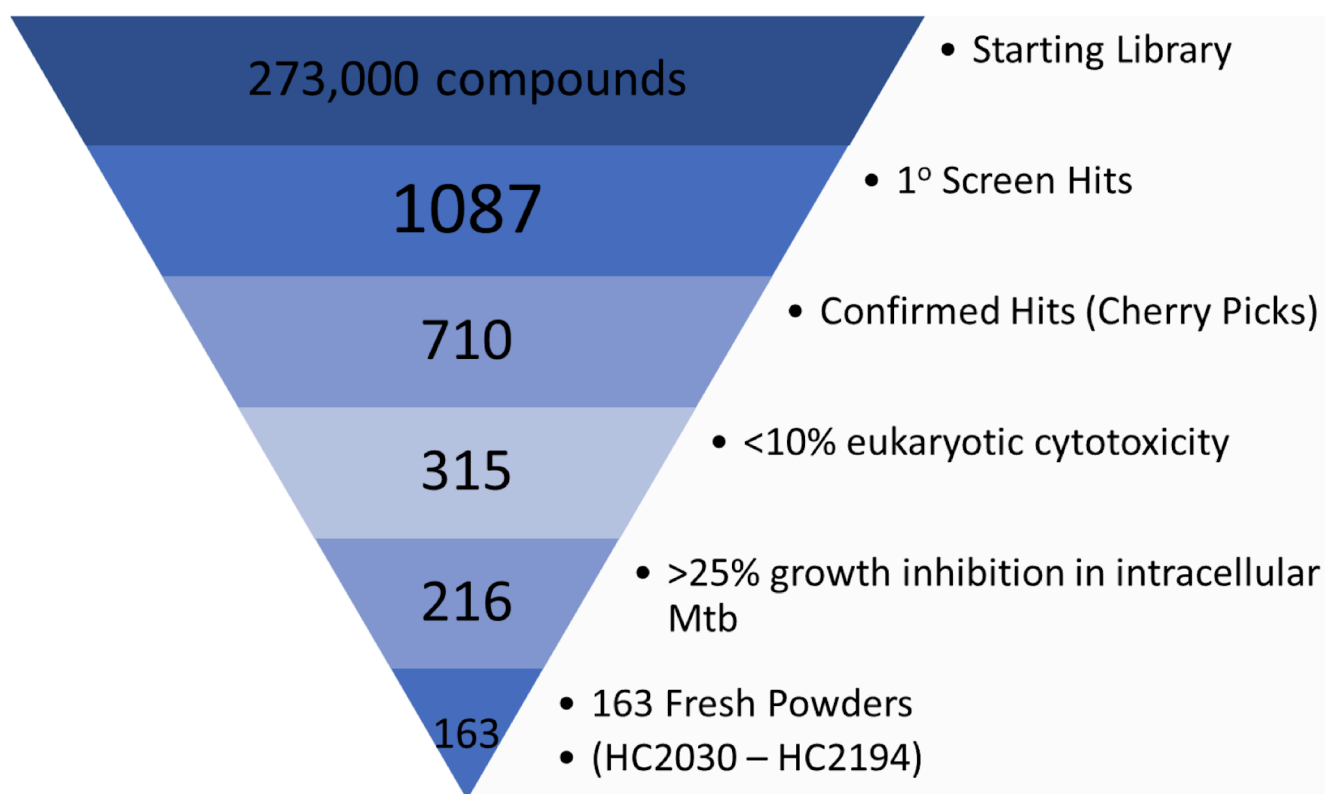

Figure S1

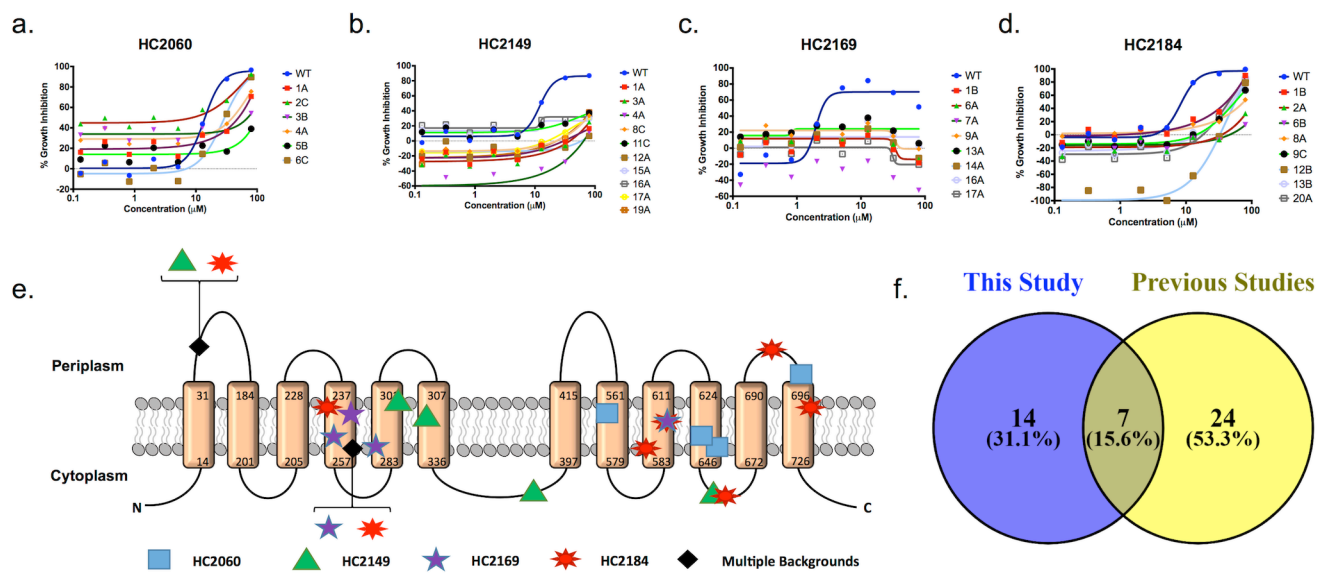

Figure S2

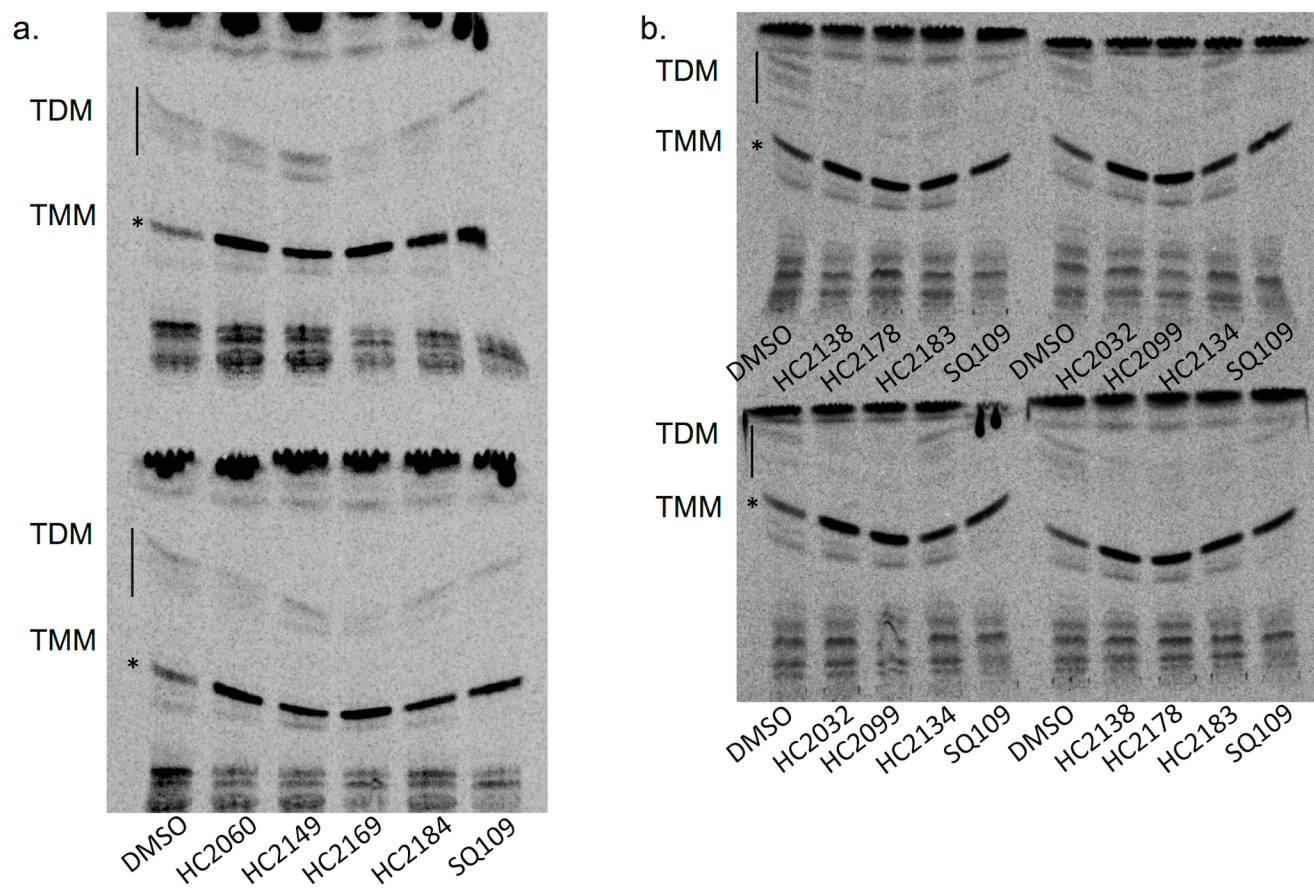

Figure S3

a.

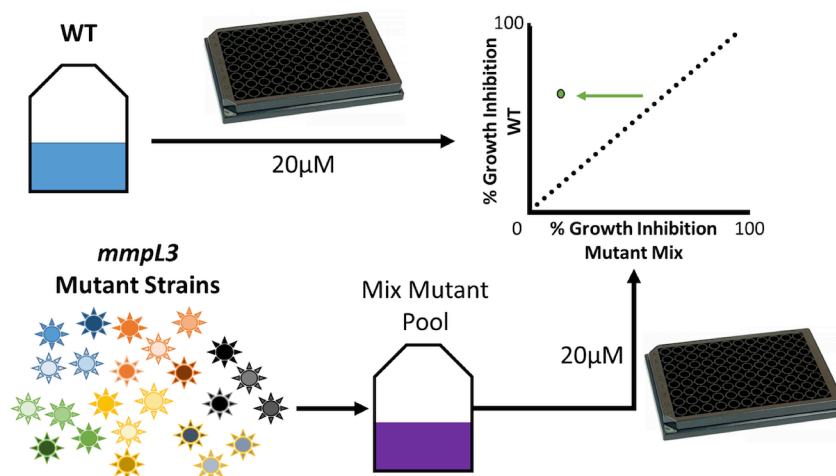

b.

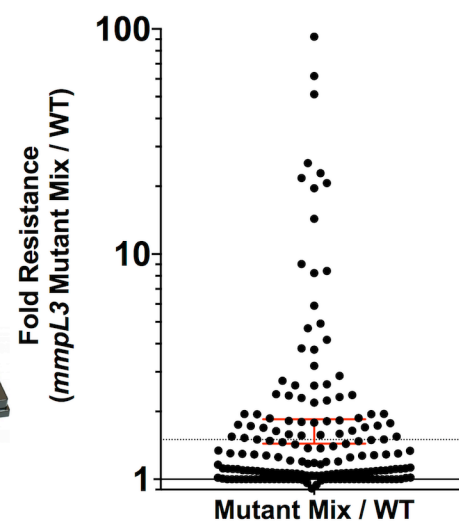

Figure S4

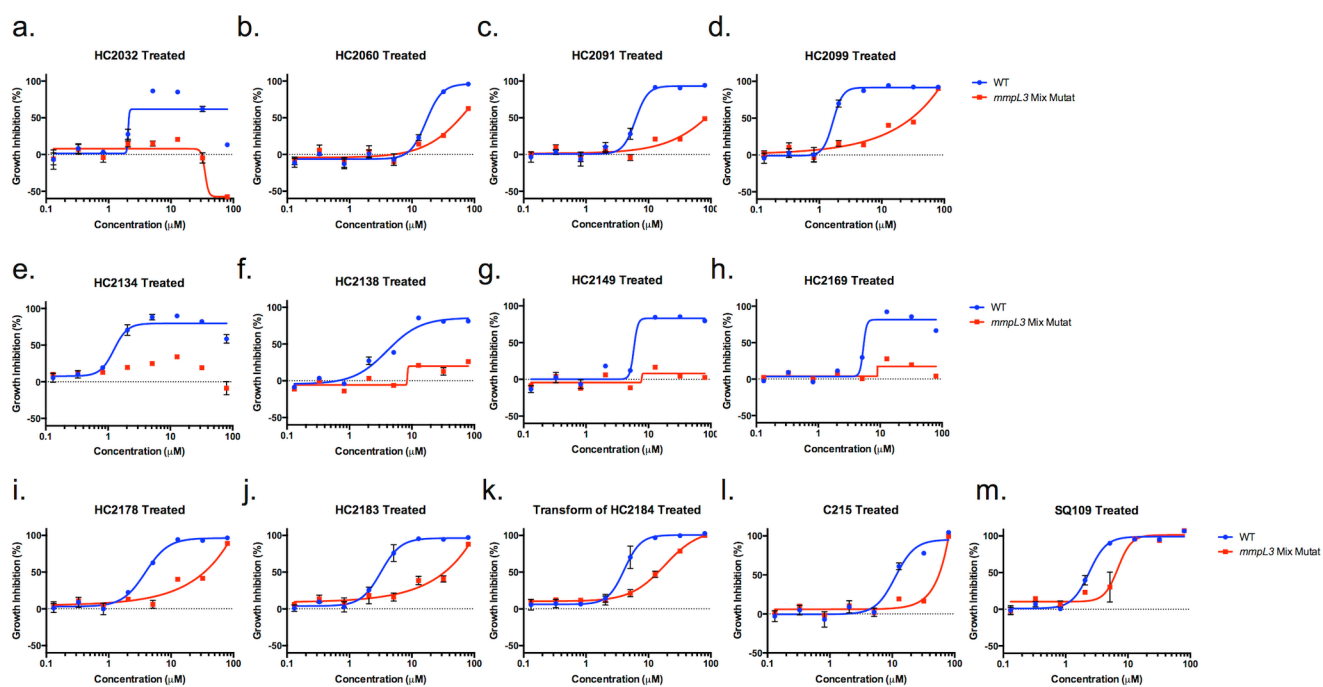

Figure S5

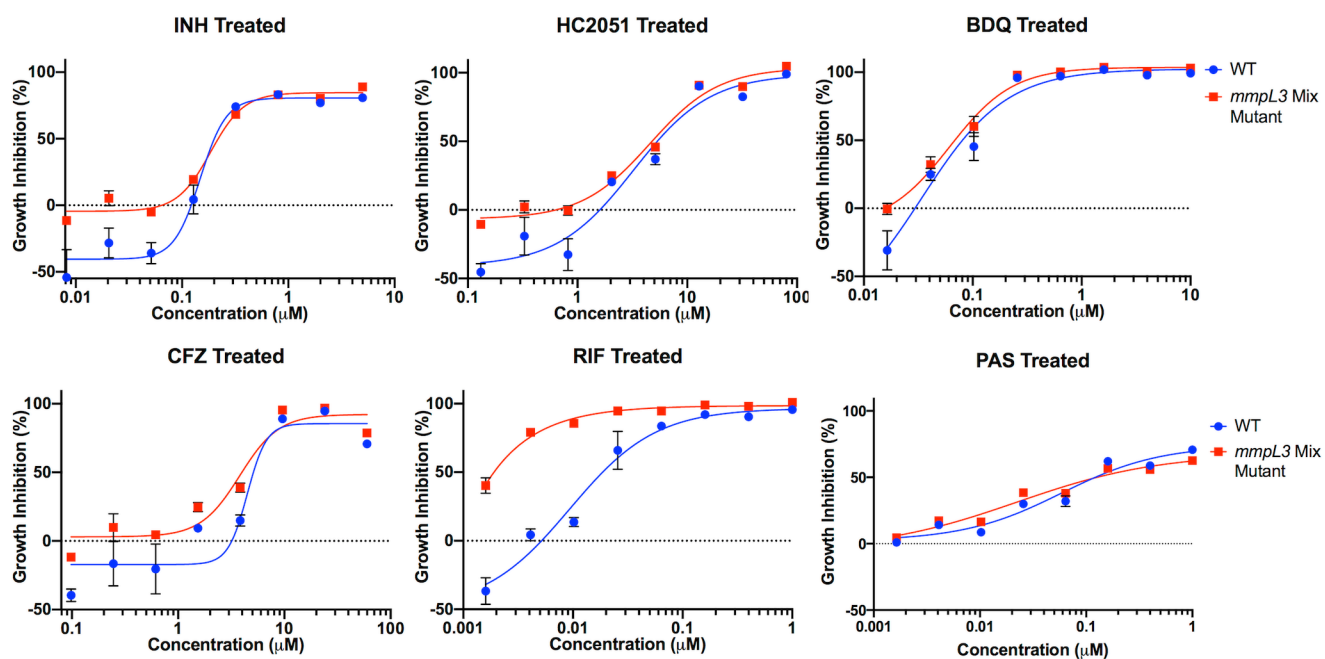

Figure S6

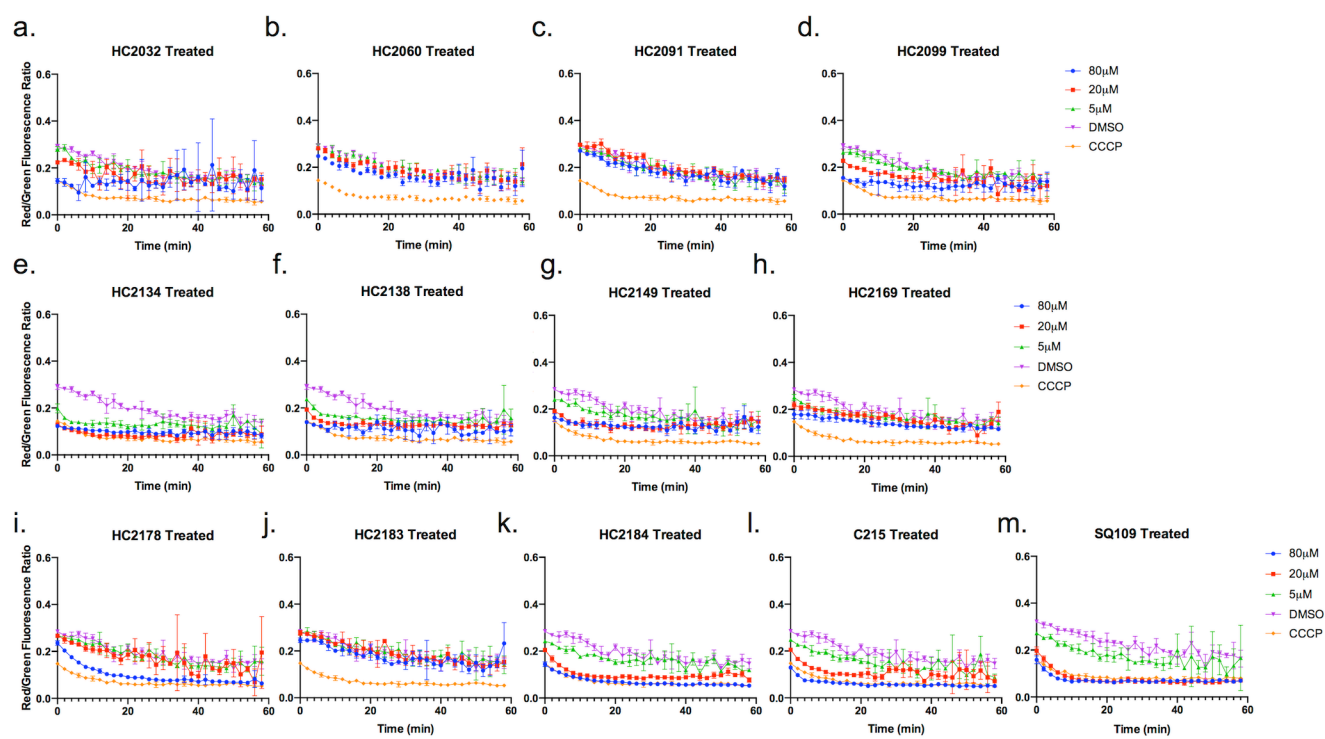

Figure S7

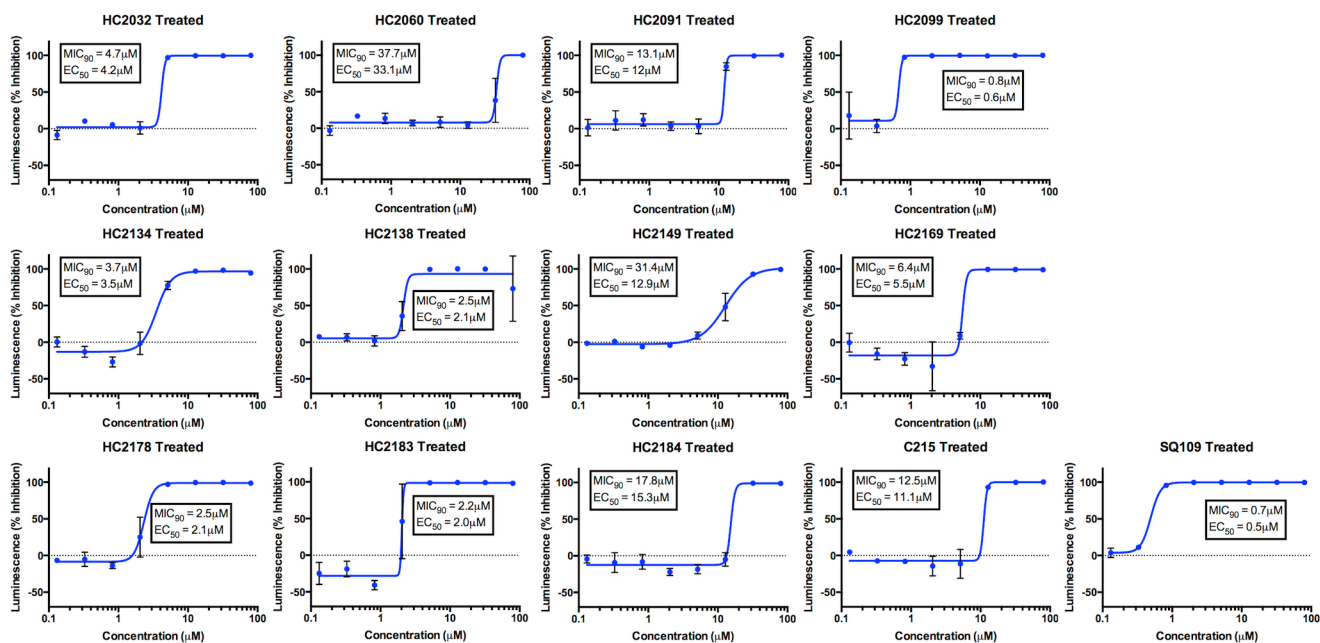

Figure S8



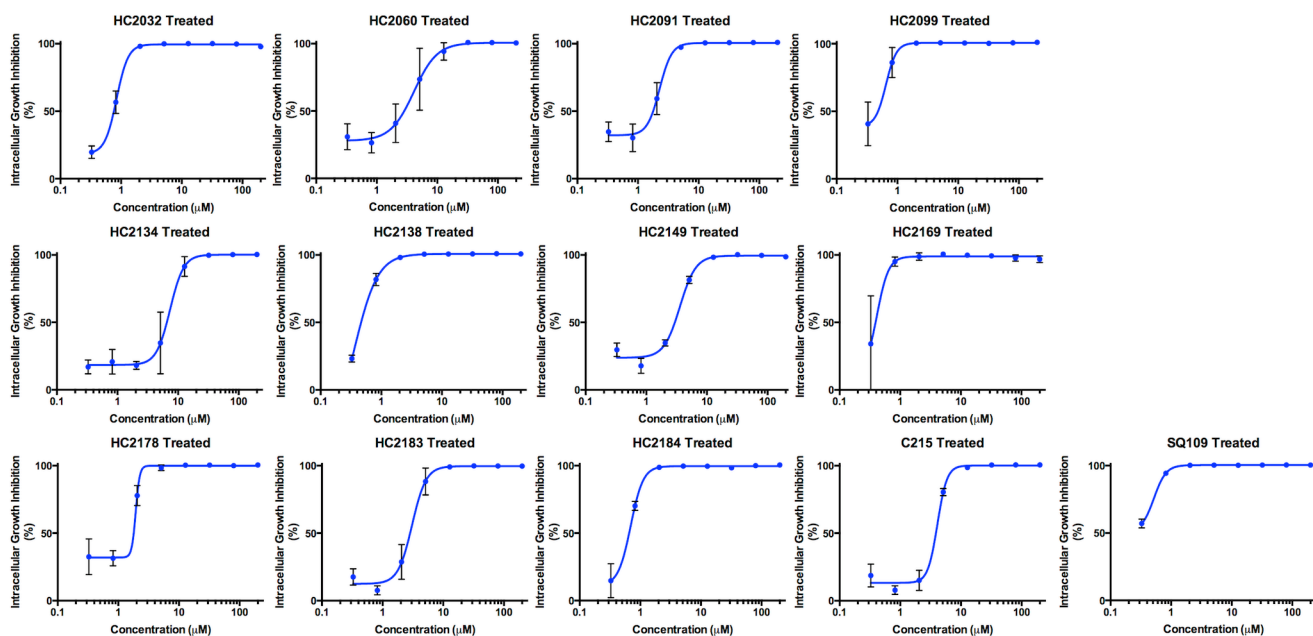

Figure S9

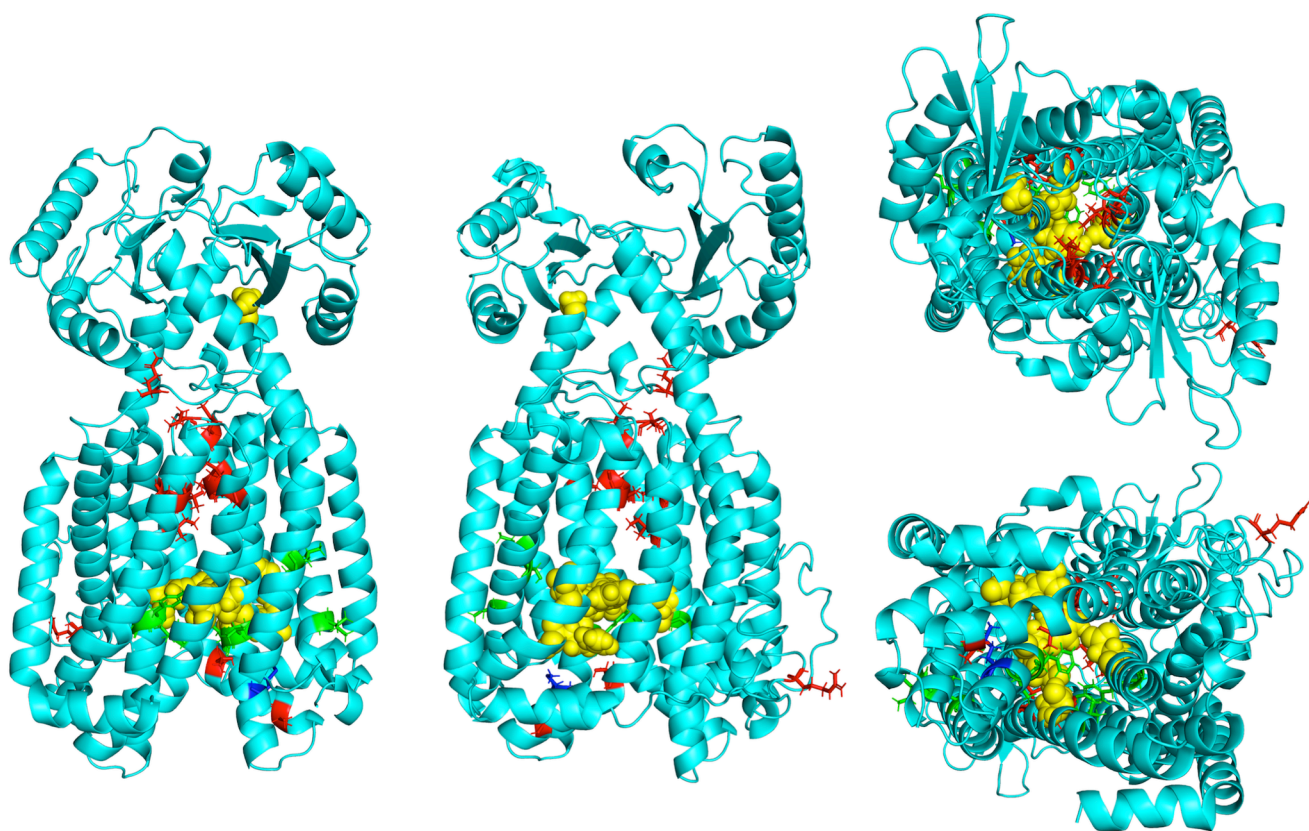

Figure S10

**TABLE S1 Sequencing Results of Resistant Mutants**

| Compound      | Strain                   | SNP Location (nt) | Quality Score                    | Gene         | Nucleotide Change  | AA Change |
|---------------|--------------------------|-------------------|----------------------------------|--------------|--------------------|-----------|
| <b>HC2060</b> | 1A / 2C                  | 245506            | 5308 / 4597                      | <i>mmpL3</i> | GTG --> <b>ATG</b> | V643M     |
|               | 3B                       | 245501            | 4710                             | <i>mmpL3</i> | TTC --> <b>TTG</b> | F644L     |
|               | 4A                       | 245733            | 3840                             | <i>mmpL3</i> | CTG --> <b>CCG</b> | L567P     |
|               | 5B                       | 245501            | 4807                             | <i>mmpL3</i> | TTC --> <b>TTA</b> | F644N*    |
|               | 6C                       | 245349            | 4795                             | <i>mmpL3</i> | ATG --> <b>ACG</b> | M695T*    |
| <b>HC2149</b> | 1A                       | 245487            | 5798                             | <i>mmpL3</i> | ATG --> <b>ACG</b> | M649T*    |
|               | 3A / 4A / 8C / 17A / 19A | 247313            | 5895 / 6057 / 5228 / 4998 / 5725 | <i>mmpL3</i> | CAG --> <b>CAT</b> | Q40H*     |
|               | 11C / 12A                | 246316            | 5127 / 6751                      | <i>mmpL3</i> | CGG --> <b>TGG</b> | R373W*    |
|               | 15A                      | 246501            | 3836                             | <i>mmpL3</i> | ACC --> <b>ATC</b> | T311I*    |
|               | 16A                      | 246537            | 3854                             | <i>mmpL3</i> | CTG --> <b>CAG</b> | L299Q*    |
| <b>HC2169</b> | 1B / 6A / 17A            | 245662            | 7164 / 6152 / 6805               | <i>mmpL3</i> | TCG --> <b>ACG</b> | S591T*    |
|               | 14A                      | 246579            | 4739                             | <i>mmpL3</i> | GTG --> <b>GGG</b> | V285G*    |
|               | 13A                      | 246675            | 4585                             | <i>mmpL3</i> | GGG --> <b>GAG</b> | G253E     |
|               | 7A / 9A                  | 246678            | 6076 / 4312                      | <i>mmpL3</i> | TAC --> <b>TGC</b> | Y252C*    |
|               | 16A                      | 246702            | 5280                             | <i>mmpL3</i> | ATC --> <b>ACC</b> | I244T*    |
| <b>HC2184</b> | 1B                       | 245355            | 5122                             | <i>mmpL3</i> | GAC --> <b>GGC</b> | L693P*    |
|               | 2A                       | 246675            | 6093                             | <i>mmpL3</i> | CCC --> <b>CTC</b> | G253E     |
|               | 6B                       | 245661            | 5719                             | <i>mmpL3</i> | TCG --> <b>TAG</b> | S591I     |
|               | 8A                       | 246678            | 5654                             | <i>mmpL3</i> | ATG --> <b>ACG</b> | I585S*    |
|               | 9C                       | 247313            | 5824                             | <i>mmpL3</i> | GTC --> <b>GTG</b> | Q40H*     |
|               | 12B                      | 245338            | 5281                             | <i>mmpL3</i> | GAC --> <b>TAC</b> | L699M     |
|               | 13B                      | 245448            | 5121                             | <i>mmpL3</i> | CGC --> <b>CTC</b> | A662E*    |
|               | 20A                      | 246714            | 3800                             | <i>mmpL3</i> | CAC--> <b>CGC</b>  | V240A*    |

\* - Novel substitutions not previously identified in Mtb

**TABLE S2 Genetic background of Mtb strains used in Screen**

| Compound Background | Mtb Strain Background | Strain | SNP Location | Quality Score | Gene         | Nucleotide Change  | Amino Acid Substitution |
|---------------------|-----------------------|--------|--------------|---------------|--------------|--------------------|-------------------------|
| <b>HC2060</b>       | Erdman                | 1A     | 245506       | 5308          | <i>mmpL3</i> | GTG --> <b>ATG</b> | V643M                   |
|                     | Erdman                | 3B     | 245501       | 4710          | <i>mmpL3</i> | TTC --> <b>TTG</b> | F644L                   |
|                     | Erdman                | 4A     | 245733       | 3840          | <i>mmpL3</i> | CTG --> <b>CCG</b> | L567P                   |
|                     | Erdman                | 5B     | 245501       | 4807          | <i>mmpL3</i> | TTC --> <b>TTA</b> | F644N                   |
|                     | Erdman                | 6C     | 245349       | 4795          | <i>mmpL3</i> | ATG --> <b>ACG</b> | M695T                   |
| <b>HC2091</b>       | CDC 1551              | 3A     | 245488       | 3441          | <i>mmpL3</i> | ATG --> <b>CTG</b> | M649L                   |
|                     | CDC 1551              | 5A     | 245424       | 2685          | <i>mmpL3</i> | ACC --> <b>AAC</b> | T670L                   |
|                     | CDC 1551              | 23A    | 245335       | 2615          | <i>mmpL3</i> | GCC --> <b>ACC</b> | A700T                   |
| <b>HC2149</b>       | Erdman                | 1A     | 245487       | 5798          | <i>mmpL3</i> | ATG --> <b>ACG</b> | M649T                   |
|                     | Erdman                | 3A     | 247313       | 5895          | <i>mmpL3</i> | CAG --> <b>CAT</b> | Q40H                    |
|                     | Erdman                | 11C    | 246316       | 5127          | <i>mmpL3</i> | CGG --> <b>TGG</b> | R373W                   |
|                     | Erdman                | 15A    | 246501       | 3836          | <i>mmpL3</i> | ACC --> <b>ATC</b> | T311I                   |
|                     | Erdman                | 16A    | 246537       | 3854          | <i>mmpL3</i> | CTG --> <b>CAG</b> | L299Q                   |
| <b>HC2169</b>       | Erdman                | 1B     | 245662       | 7164          | <i>mmpL3</i> | TCG --> <b>ACG</b> | S591T                   |
|                     | Erdman                | 14A    | 246579       | 4739          | <i>mmpL3</i> | GTG --> <b>GGG</b> | V285G                   |
|                     | Erdman                | 13A    | 246675       | 4585          | <i>mmpL3</i> | GGG --> <b>GAG</b> | G253E                   |
|                     | Erdman                | 7A     | 246678       | 6076          | <i>mmpL3</i> | TAC --> <b>TGC</b> | Y252C                   |
|                     | Erdman                | 16A    | 246702       | 5280          | <i>mmpL3</i> | ATC --> <b>ACC</b> | I244T                   |
| <b>HC2184</b>       | Erdman                | 1B     | 245355       | 5122          | <i>mmpL3</i> | GAC --> <b>GGC</b> | L693P                   |
|                     | Erdman                | 6B     | 245661       | 5719          | <i>mmpL3</i> | TCG --> <b>TAG</b> | S591I                   |
|                     | Erdman                | 8A     | 246678       | 5654          | <i>mmpL3</i> | ATG --> <b>ACG</b> | I585S                   |
|                     | Erdman                | 12B    | 245338       | 5281          | <i>mmpL3</i> | GAC --> <b>TAC</b> | L699M                   |
|                     | Erdman                | 13B    | 245448       | 5121          | <i>mmpL3</i> | CGC --> <b>CTC</b> | A662E                   |
|                     | Erdman                | 20A    | 246714       | 3800          | <i>mmpL3</i> | CAC--> <b>CGC</b>  | V240A                   |

**TABLE S3 – EC<sub>50</sub> Values of Control Compounds**

| Treatment     | WT EC <sub>50</sub> | Mix Mutant EC <sub>50</sub> | 95% Confidence Interval |
|---------------|---------------------|-----------------------------|-------------------------|
| <b>INH</b>    | 0.15                | 0.18                        | n.s.                    |
| <b>HC2051</b> | 3.2                 | 4.5                         | n.s.                    |
| <b>CFZ</b>    | 4.4                 | 3.8                         | n.s.                    |
| <b>BDQ</b>    | 0.03                | 0.06                        | n.s.                    |
| <b>RIF</b>    | 0.009               | <0.009                      | N.D.                    |
| <b>PAS</b>    | 0.05                | 0.02                        | n.s.                    |

n.s. – Not significant

N.D. – Not determined

**Table S4 – AUC Values from Cross Resistance Profiling**

|                           | HC2032 | HC2060 | HC2091 | HC2099 | HC2134 | HC2138 | HC2149 | HC2169 | HC2178 | HC2183 | HC2184 | C215  | SQ109  |
|---------------------------|--------|--------|--------|--------|--------|--------|--------|--------|--------|--------|--------|-------|--------|
| Q40H <sup>E</sup>         | 42.98  | 68.03  | 84.3   | 101.8  | 63.23  | 37.49  | 44.07  | 42.17  | 92.35  | 96.53  | 63.86  | 131.7 | 143    |
| V240A <sup>E</sup>        | 102.2  | 82.81  | 73.08  | 89.43  | 68.44  | 15.86  | 77.88  | 94.26  | 108.7  | 107.7  | 68.1   | 26.77 | 143.3  |
| I244T <sup>E</sup>        | 110.9  | 69.62  | 60.8   | 67.29  | 86.09  | 65.59  | 58.91  | 52.76  | 97.73  | 96.78  | 73.2   | 33.41 | 132.8  |
| T252C <sup>E</sup>        | 149.4  | 48.76  | 27.29  | 55.58  | 35.23  | 14.64  | 23.38  | 35.96  | 87.77  | 60.9   | 58.37  | 18.72 | 181.4  |
| G253E <sup>E</sup>        | 18.23  | 60.32  | 18.2   | 44.63  | 11.15  | 7.195  | 10.61  | 29.13  | 54.42  | 57.9   | 32.29  | 15.03 | 146    |
| V285G <sup>E</sup>        | 31.87  | 40.62  | 39.38  | 48.43  | 29.35  | 34.77  | 34.81  | 41.29  | 78.09  | 57.41  | 59.12  | 33.96 | 117.1  |
| L299Q <sup>E</sup>        | 95.93  | 85.39  | 72.67  | 90.14  | 59.81  | 37.88  | 21.73  | 55.48  | 91.53  | 93.22  | 73.78  | 40.02 | 157.2  |
| T311I <sup>E</sup>        | 94.83  | 84.38  | 101.8  | 115.7  | 106.2  | 68.61  | 23.31  | 54.41  | 114.1  | 123.6  | 96.01  | 127.8 | 167.8  |
| R373W <sup>E</sup>        | 62.68  | 78.36  | 70.65  | 79.96  | 53.12  | 85.28  | 37.85  | 35.57  | 105.8  | 91.78  | 100.1  | 62.15 | 157.2  |
| L567P <sup>E</sup>        | 43.81  | 40.82  | 40.23  | 52.93  | 35.96  | 69.17  | 120.2  | 157.9  | 80.5   | 61.52  | 69.83  | 137.5 | 157.3  |
| I585S <sup>E</sup>        | 165.1  | 47.59  | 26.81  | 40.55  | 31.87  | 53.06  | 23.38  | 19.76  | 90.54  | 34.68  | 35.16  | 31.11 | 201.3  |
| S591I <sup>E</sup>        | 28.78  | 21.79  | 76.97  | 38.94  | 18.47  | 18.89  | 12.86  | 22.95  | 35.47  | 55.81  | 28.15  | 11.45 | 110.7  |
| S591T <sup>E</sup>        | 31.85  | 39.27  | 66.47  | 65.59  | 68.16  | 43.98  | 24.29  | 28.08  | 80.44  | 90.53  | 50.04  | 32.04 | 144.8  |
| V643M <sup>E</sup>        | 33.28  | 40.88  | 28.28  | 41.06  | 36.34  | 48.63  | 38.99  | 98.7   | 56.54  | 46.87  | 54.33  | 88.44 | 117.9  |
| F644L <sup>E</sup>        | 34.12  | 21.31  | 25.91  | 48.32  | 130.9  | 123.7  | 93.34  | 58.46  | 51.75  | 38.31  | 65.11  | 48.58 | 132.2  |
| F644N <sup>E</sup>        | 25.76  | 27.24  | 38.88  | 53.13  | 123.5  | 101.5  | 95.12  | 54.82  | 54.16  | 54.71  | 82.96  | 14.76 | 117.6  |
| M649L <sup>C</sup>        | 22.92  | 82.01  | 38.01  | 68.54  | 73.58  | 72.83  | 47.07  | 28.83  | 96.72  | 41.98  | 62.24  | 55.8  | 175.5  |
| M649T <sup>E</sup>        | 43.61  | 72.15  | 47.2   | 66.99  | 84     | 82.72  | 17.65  | 23.53  | 105.5  | 97.45  | 67.32  | 50.67 | 171.8  |
| A662E <sup>E</sup>        | 100.1  | 101.7  | 51.92  | 83.82  | 132.1  | 129.6  | 69.05  | 44.16  | 134.3  | 110.9  | 70.83  | 37.18 | 183.2  |
| T670L <sup>C</sup>        | 75.25  | 75.14  | 21.15  | 52.09  | 109.1  | 118.3  | 56.69  | 71.4   | 151.6  | 64.69  | 59.74  | 88.44 | 174.2  |
| L693P <sup>E</sup>        | 88.03  | 73.82  | 86.89  | 88.84  | 96.19  | 107.3  | 83.23  | 39.29  | 93.76  | 111.5  | 63.13  | 71.82 | 169.4  |
| M695T <sup>E</sup>        | 79.44  | 55.82  | 89.55  | 103.1  | 92.69  | 45.96  | 61.88  | 79.04  | 60.96  | 103.9  | 68.95  | 92.96 | 139.8  |
| L699M <sup>E</sup>        | 55.85  | 69.13  | 57.75  | 89.07  | 90.94  | 42.28  | 60.88  | 69.08  | 90.47  | 90.9   | 66     | 51.01 | 134.2  |
| A700T <sup>C</sup>        | 69.86  | 79.3   | 43.85  | 78.75  | 90.92  | 132.3  | 59.37  | 45.64  | 106.9  | 99.82  | 83.75  | 61.3  | 151.5  |
| WT-<br>CDC1551            | 136.2  | 93.86  | 114    | 129.8  | 159    | 150.7  | 96.38  | 151.5  | 148.2  | 154.7  | 123    | 97.66 | 193.8  |
| Average<br>WT -<br>Erdman | 115.96 | 74.87  | 101.18 | 115.1  | 142.74 | 140.3  | 89.33  | 141.14 | 130.32 | 138.96 | 94.88  | 69.12 | 171.88 |

E or C indicates the WT background that the AUC was compared to. E – Erdman and C – CDC1551
